# Supplementary material
Source: publisher figshare collection journal article supplement (https://acs.figshare.com/ndownloader/files/22414470)
Supplement: Supplementary file 1 [file 22414470]

## Sheet: Sheet1
Alignment ID	ESI Mode	Adduct	Metabolite	m/z	RT (s)	VIP	FC	P.value	C_01	C_02	C_03	C_04	C_05	C_06	C_07	C_08	C_09	C_10	C_11	C_12	C_13	C_14	C_15	C_16	C_17	C_18	C_19	C_20	AMD_01	AMD_02	AMD_03	AMD_04	AMD_05	AMD_06	AMD_07	AMD_08	AMD_09	AMD_10	AMD_11	AMD_12	AMD_13	AMD_14	AMD_15	AMD_16	AMD_17	AMD_18	AMD_19	AMD_20	AMD_21
Neg00931	Negative	[M-H]-	5-Aminopentanoic acid	116.073	7.41	1.43728	1.17402	0.0332528	881983	574876	687806	983029	691643	585153	900778	503728	685183	655585	601795	834994	954158	940606	597159	334449	492865	466330	421175	751591	556916	531631	527553	667472	783704	496882	361015	371690	582788	440646	433430	438440	678311	571469	706068	635012	661034	676461	640632	698199	745990
Neg01278	Negative	[M-H]-	Itaconic acid	129.021	11.37	1.70405	0.779436	0.0150547	240423	122317	73164.4	245872	76290.4	138237	67441.3	245150	263794	202430	232282	282270	289473	223467	251666	79732.5	165631	33114.6	100775	129812	235766	204662	190361	254919	226597	141621	232892	261583	233408	183681	237661	210597	208506	195839	280003	241381	247383	249154	227013	192077	346949
Neg02509	Negative	[M-H]-	L-Phenylalanine	164.073	6.23	1.48879	1.30958	0.0388073	4.03905e+06	6.6031e+06	3.51449e+06	2.88927e+06	3.59248e+06	1.48934e+06	5.92819e+06	2.36837e+06	3.0494e+06	2.59404e+06	2.56401e+06	3.31911e+06	3.3502e+06	2.04198e+06	2.6001e+06	1.63841e+06	1.22999e+06	1.40522e+06	1.55141e+06	1.49656e+06	2.67452e+06	1.93113e+06	3.22763e+06	2.20971e+06	3.21334e+06	2.3299e+06	2.34e+06	1.78022e+06	3.13131e+06	2.18439e+06	2.8326e+06	1.78094e+06	3.31595e+06	2.57845e+06	1.78001e+06	2.20844e+06	1.52107e+06	3.06066e+06	2.26136e+06	1.37679e+06	1.68882e+06
Neg02559	Negative	[M-H]-	3-Phenyllactic acid	165.056	1.1	1.44928	1.48816	0.0462695	99821.3	267027	109927	93589.2	99777.3	90516.7	206691	111028	43944.9	135423	103445	99582.9	52836.4	69702.7	73157.3	16858.8	18978.5	21012.4	13687.9	32314.8	46045.6	39023.6	52950.6	66161.7	57406.1	58081.7	127405	135610	32357.5	29847.1	98200.2	74736.7	61670.7	59458.9	72384.7	65227.6	66097.4	61783.5	42894.8	83715.9	57941.9
Neg02855	Negative	[M-H]-	cis-Aconitate	173.009	11.37	1.67156	0.783682	0.0172789	442681	228618	145168	455171	148122	250038	121117	477061	484189	383057	430379	518390	543476	406207	455764	145694	305363	56718.6	187656	241821	444739	375395	368837	480613	418000	268774	414762	485346	437019	329065	427993	386381	392926	358916	525275	427693	446331	472249	420667	359332	626133
Neg10698	Negative	[M+FA-H]-	Hetisine	374.2	0.88	1.53244	1.4706	0.0263322	8890.39	7962.68	14239.6	18608.4	16603.6	14542.9	10604.2	10218.1	9531.02	2952.17	7686.26	4706.2	6812.22	9483.51	12048.4	6044.32	2901.32	29322.4	5547.28	6552.22	5710.25	2781.65	10121.8	15800.2	9423.09	4360.19	4122.27	7015.44	4463.85	11819.4	8297.19	11024.7	187.569	11596.9	5567.08	5746.29	4657.73	5200.26	9301.88	9811.07	8228.01
Pos00275	Positive	[M+H]+	L-Proline	116.071	7.83	2.02077	28.3497	0.00348076	13538.9	101372	106785	793.016	85745.6	177552	142907	401.405	1200.37	100.268	1213.6	494.904	688.25	3504.54	111	707.561	572.543	427.828	255.19	71477.9	264.079	87.3861	454.934	2321.62	330.375	685.736	1581.97	5743.59	1099.01	687.836	4457.38	1271.73	682.505	838.16	675.661	664.257	3249.9	215.066	1226.29	2222.85	1279.83
Pos00313	Positive	[M+H]+	Glycine-Betaine	118.086	11.05	1.56267	0.767518	0.0412461	33233.3	82596.4	340146	36552.7	58604.3	143461	178761	188030	165197	181591	216449	162368	258513	190599	193116	262627	274082	238095	262093	106167	260712	292499	208224	89423.4	175007	243301	150052	117948	91289.9	176351	152334	302499	136849	141157	292282	153971	270523	281683	301106	297317	257665
Pos00500	Positive	[M+H]+	Creatine	132.077	8.78	2.73223	8.56318	1.79527e-05	85856.2	76007.9	118018	477051	94013	125034	64674.1	118683	317495	155123	139993	214110	187694	3411.05	102015	20146.8	22194.7	9064.11	18263.8	85573.2	16343	15182.9	23939.4	29315.2	16298.9	34767.2	652.239	774.911	14259.5	2135.5	1757.07	25002.2	14994.4	22365.9	5294.28	9718.35	8784.61	6636.47	19421.7	13803.3	22038
Pos00506	Positive	[M+H]+	Norleucine	132.101	6.44	1.28093	1.23886	0.0474027	1.22262e+06	753163	832243	571703	988761	354216	750023	485719	912842	751790	866602	841722	1.1947e+06	922088	825258	407499	552024	523673	403873	1.09598e+06	468748	527799	454799	582639	414267	447677	285670	229347	623553	591815	478178	360364	1.0655e+06	569440	981025	821003	869913	897065	869372	892632	822768
Pos00683	Positive	[M+H]+	Deoxycarnitine	146.118	8.4	1.8719	0.416311	0.00455042	144.947	174.489	112.719	6420.87	133.017	78.9921	0	10691.4	26.7206	77.4346	1663.46	792.614	94.931	1824.28	3265.26	2826.41	814.326	5049.79	21388.5	9751.85	10972.5	12279.7	2726.68	18319	1112.47	16874	6571.74	6856.67	4509.4	12281.3	2055.46	206.918	6640.7	3194.83	366.117	2615.34	3750.32	8924.27	9477.64	2954.48	10301.7
Pos00986	Positive	[M+H]+	Carnitine	162.113	8.93	1.86561	1.39451	0.00627448	3.42379e+06	5.65056e+06	5.30554e+06	6.80503e+06	4.80997e+06	4.57975e+06	4.73588e+06	4.41941e+06	4.28436e+06	3.7322e+06	4.0634e+06	3.92729e+06	1.99499e+06	1.80842e+06	3.30709e+06	1.78819e+06	1.81388e+06	1.68202e+06	1.47217e+06	3.70692e+06	2.77294e+06	2.28006e+06	3.20345e+06	3.37012e+06	2.21102e+06	4.71252e+06	1.83686e+06	2.08617e+06	2.69041e+06	1.51007e+06	1.08605e+06	4.93174e+06	2.8842e+06	2.44026e+06	3.02305e+06	1.43613e+06	1.47888e+06	2.65674e+06	3.18959e+06	2.65595e+06	3.49091e+06
Pos01518	Positive	[M+H]+	N6,N6,N6-Trimethyl-L-lysine	189.16	12.5	1.84775	0.561919	0.00533871	1408.18	2352.59	2734.65	1595.17	2936.5	3234.59	2088.54	1725.54	2296.95	2474.93	2485.87	1622.06	2871.66	3449.79	1749.94	2774.56	749.528	2225.06	920.174	3153.09	2019.33	6533.57	3061.47	2778.01	3761.19	1577.98	3244.75	5826.24	2596.23	3356.78	1292.8	4973.01	4188.24	3062.1	2696.24	8310.16	8481.73	8526.69	1494.67	1631.19	2846.77
Pos01657	Positive	[M+H]+	N-Acetylhistidine	198.085	7.99	1.45553	2.18358	0.0417775	38613.1	105342	135855	67.6074	104300	105356	4060.7	10487.3	54.469	229.326	175.101	52.9432	308.526	22101.1	170.705	37068.7	38670.8	19896.2	5186.69	107118	32632.3	37256.6	15538.1	92.8649	13109.5	4710.37	17343	30717.4	26378.2	15894	12188.6	23208.5	13860.3	6736.63	34935.8	24450.6	30160.6	31990.6	2701.86	8805.51	824.421
Pos03397	Positive	[M+H]+	gamma-Glutamylglutamine	276.119	11.18	1.88249	1.43986	0.00520636	72023	115549	68969.2	40499.6	120358	70420.1	88579.1	37390.6	52213.1	52841.2	56572.4	64059.8	51830.2	55169.7	35205.7	31943	31368	30690.2	21520.7	49531.7	36557.4	19426.9	38199.1	46821.4	43002.7	39469.7	20249.5	39195.9	21120.7	25173.2	23853.3	37041.8	55209.4	37179	46357	53999.4	57303.6	56152	55904.9	56749.9	53128.4
Pos03431	Positive	[M+H]+	Coumaroyl agmatine	277.166	6.15	1.72538	1.66594	0.00986845	418.151	335.44	205.834	222.922	542.191	999.659	558.347	375.588	552.912	488.434	158.336	118.163	647.257	306.573	186.683	78.7246	236.948	125.78	112.693	361.118	231.51	301.968	191.204	38.0984	214.744	59.4828	164.49	163.019	401.164	270.624	270.497	266.204	242.346	161.988	187.862	141.745	243.625	527.8	128.66	44.3992	77.402
Pos04119	Positive	[M+H]+	N-Fructosyl isoleucine	294.155	7.92	1.91879	8.82099	0.00580632	84168.7	84050.9	86862	136.128	146845	93242	24204.5	350.605	117.16	63.5361	684.569	40.6665	347.361	656.1	117.728	245.774	714.712	240.044	0	132863	12865.1	12007.8	4939.81	203.192	1925.07	455.661	336.132	7512.54	11256.2	368.638	48.8289	5172.95	307.593	4175.12	9003.48	155.642	350.858	19608.5	2556.12	3641.7	747.919
Pos09562	Positive	[M+H]+	LPC 18:2	520.341	3.99	1.42621	1.55478	0.0286295	779.201	1343.26	501.517	566.44	1095.95	1293.84	511.302	211.529	865.337	1080.11	990.996	2449.2	944.995	341.947	577.707	718.122	951.659	734.305	936.007	1872.46	267.6	369.935	301.824	225.416	258.582	318.738	395.492	501.19	167.562	248.072	443.335	413.836	844.069	245.595	307.41	964.424	331.104	826.723	764.925	537.616	1326.63
Neg00232	Negative	[M-H]-	Propionic acid	73.0307	1.12	0.582594	1.1499	0.508349	50235.1	49112.4	54130.1	55717.8	54470.1	58723.7	65708.6	31165	4842.24	6053.56	35348.4	9801.38	4062.63	23986	22714.1	13035.4	17236.6	9937.89	10435.5	6017.5	31651.7	45349.7	33761.7	38180.8	26688.1	40315.5	32214.2	51566.2	44600.7	44889.7	49400.3	36873.7	31933.8	48023.3	10897.3	15522.4	8359.31	2505.01	5007.34	4744	12316.7
Neg00704	Negative	[M-H]-	DL-3-Aminoisobutyric acid	102.057	8.07	0.528398	0.853404	0.422947	18944.3	11948.6	34570.2	2840.03	43875.1	18414.3	28786.5	2277.31	3578.86	3848.61	4441.47	4338.5	8856.73	21827.2	6218.25	10427.7	10143.4	9397.06	8700.56	22010.6	31470.9	17449.3	30097.6	2094.22	16898	9221.06	31444.6	15633.4	13580.4	9666.99	19418.4	14401.2	18820.4	16595.3	23337.8	24035.6	20767.6	28405	4782.48	10783.7	4565.5
Neg00724	Negative	[M-H]-	DL-beta-Hydroxybutyric acid	103.041	5.67	0.187998	1.02717	0.925575	22277.3	33614.6	56828.1	32227.1	92702.5	81137.6	40427.9	53511.5	510.816	387.96	584.592	348.457	211.101	142.505	260.353	18749.4	250.671	18472.3	18766.4	32633	54101.1	38061.7	31344.1	66036.9	26454.5	21354.3	35236.2	30772.2	26819.8	21963.6	39582.3	28866.3	59305.4	45753.5	683.455	125.492	360.027	432.022	426.61	417.546	512.896
Neg00727	Negative	[M-H]-	2-Hydroxybutyric acid	103.041	4.82	0.702297	1.35921	0.328839	153304	173109	4649.88	220518	315618	5839.49	155357	6288.28	105972	85099.9	106323	146420	130082	128666	165605	753.386	1898.64	1725.27	1118.87	2205.19	217569	4094.74	6312.84	199654	4543.22	3005.2	244660	3760.07	93200.2	1220.35	2450.87	1485.79	58641.7	1279.59	112961	114626	117399	147000	73477.4	74283.6	238140
Neg00730	Negative	[M-H]-	3-Hydroxybutyric acid	103.042	5.77	0.0236614	0.984735	0.95905	23792.1	35208.4	117963	2692.51	95576.7	1049.66	41562.5	121102	21394.4	29674.4	24656.7	32083.4	30204.3	22947.1	25734	18669	20593.2	18718.4	17706.6	32961.5	54839.1	38633.3	597.074	145779	462.272	107738	872.308	553.957	529.921	330.381	322.916	28606	110084	100560	45165.9	29328.2	27487.8	31904.7	25084.7	17612	66579.8
Neg00738	Negative	[M-H]-	Serine	104.037	9.32	1.02885	1.76242	0.185796	22783.8	27359.1	33051.6	12359.8	22913.7	13049.9	44776	10142	33.634	41.3212	50.9226	65.8423	55.9417	121.36	69.2325	37.3342	47.0008	33.3517	31.052	35.3537	10678.2	6560.98	5555.26	9135.75	11426.3	7136.13	8021.28	7091.85	11813.7	11328.7	24325	3288.51	13147.1	7869.1	43.3939	53.5314	61.5121	40.8909	86.2108	15.1835	98.4254
Neg00751	Negative	[M-H]-	D-Glyceric acid	105.022	6.04	0.40556	0.726561	0.426619	492454	495066	476329	1.40425e+06	425469	503364	145194	949819	182.885	200.867	196.561	407.209	62.2747	406.371	128.714	165.611	97.9183	63.0977	217.364	237.165	786957	743272	734037	855956	765757	784289	111688	816288	840645	127122	27301.8	747460	550150	864254	113.909	242.208	141.116	216.9	225.748	397.302	204.978
Neg00797	Negative	[M-H]-	Creatinine	112.052	4.15	0.761609	0.834274	0.326494	8671.38	7407.93	6567.16	3471.62	7862.3	2847.36	12551.2	9740.21	7921.85	13485.6	17445.1	17533.3	9190.27	8656.98	10882.2	6713.46	6377.42	3908.45	7442.46	6773.19	4446.21	4641.68	7736.28	5470.87	5339.19	6959.86	5695.44	15982.3	8443.11	4649.5	12329.8	7236.16	40130.1	13586.4	9712.11	6068.36	14474.3	13209.5	7717.2	10016.1	11821
Neg00882	Negative	[M-H]-	Fumaric acid	115.004	10.35	0.8142	0.313483	0.224165	857.785	525.635	3427.7	1194.44	630.299	548.961	915.784	886.875	194.446	408.621	1481.85	5290.68	872.901	4164.84	1102.84	253.681	122.398	322.7	211.354	397.729	828.353	910.439	1559.18	700.279	666.418	559.081	42642.3	529.828	607.628	20707.4	17101	1413.49	573.287	723.989	1820.74	934.606	326.557	359.129	1027.42	927.037	2426.32
Neg00899	Negative	[M-H]-	Ketovaline	115.042	0.94	0.669292	1.54801	0.366158	1.9533e+06	33950.2	153972	1.741e+06	67200.4	91709.6	2.52213e+06	543936	3829.02	4960.84	4060.57	5550	4573.5	9317.1	11014.8	452050	432054	389880	442887	102876	188296	153888	252832	273273	159707	707682	781390	117589	192108	818084	1.6562e+06	842520	291.453	1.19876e+06	2784.44	9896.29	6294.13	3077.49	4679.38	4440.33	7278.97
Neg00903	Negative	[M-H]-	tert-Butyric acid	115.078	1.12	0.372998	1.27061	0.457345	166190	36371.5	32895.1	31200.2	45428.7	33458	30229.9	30883.4	109843	96261.2	58913.4	107517	104464	166571	80241.4	11293.1	12396.5	7387.84	12390.7	14769	1341.5	26813.2	12563.3	2341.82	15553.3	24110.8	14518.4	28469	1616.74	106486	21013.7	73183.4	22575.6	22226.9	109746	54343.2	62810.2	305932	54897.6	61359.9	83073.8
Neg00915	Negative	[M-H]-	N-Acetylglycine	116.035	7.06	1.01	1.20931	0.160084	2467.27	3573.71	4946.37	5324.87	3744.63	2695.04	3465.29	3639.99	3196.28	4113.76	5049.49	6107.12	4016.19	1947.27	3727.83	1129.6	1718.47	1368.32	2736.58	1853.12	2213.96	1423.82	2651.52	2024.29	2839.39	2196.31	3547.64	5103.24	2783.43	2009.14	2568.82	3287.3	6947.74	2229.44	2441.81	2624.79	2122.17	1743.2	2397.02	5559.69	3975.85
Neg00929	Negative	[M-H]-	L-Norvaline	116.073	6.29	0.507456	0.779889	0.672299	326.232	350.934	235.541	489.808	275.845	277.497	166.37	256.916	69204	1095.01	3316.08	6582.2	45934.5	774.127	3842.89	431.737	4347.57	390.305	745.247	20745.3	361.463	205.8	228.374	176.723	135.443	262.779	199.708	340.819	518.049	237.265	83.146	418.143	306.843	301.494	41443	3309.29	8234.48	38593.9	2378.35	2993.68	1328.29
Neg00930	Negative	[M-H]-	5-Aminovaleric acid	116.073	6.5	0.350422	0.888443	0.842773	897.708	652.83	149.89	844.991	508.812	800.819	785.386	251.778	67370.9	183.65	2562.43	8525.05	41263.9	1188.77	3728.8	498.747	2024.95	347.038	184.308	13521.3	204.399	392.585	487.014	384.633	310.144	843.488	750.788	1498	1422.47	641.959	203.998	635.047	837.807	1280.59	27683.5	2045.6	4570.89	41596.7	1783.76	2469.85	2621.37
Neg00963	Negative	[M-H]-	Succinic acid	117.02	9.95	1.14198	1.1822	0.136272	52996.7	40415.7	53495.9	70529.5	28459.2	42942.6	90370.3	64069.8	60057.6	56097	38672.7	42418.6	65287.1	57936.3	42412.2	23581.8	24623.5	20587	47221	62315.4	50962	45372.1	59622.1	54533.8	81158.7	27614.5	35505.6	48384.2	34846.3	18615.9	19005.6	26994.9	32837	30173.6	70075.8	44480.2	59915.5	48588.2	48117.2	36778.7	57351.3
Neg00987	Negative	[M-H]-	DL-2-Hydroxyvaleric acid	117.058	1.06	1.32404	2.03136	0.0840174	508216	752015	842677	425165	542960	432406	530810	332105	1895.06	13481	6147.38	8277.89	4478.5	7717.36	3561.08	4695.5	2354.93	3188.24	5238.77	839.651	168355	139919	245112	394787	217628	279869	194174	216993	140715	114201	392287	64444.6	2897.22	214458	2780.83	7857.71	1497.1	595.585	5274.86	8962.48	10215.5
Neg01000	Negative	[M-H]-	1H-Benzotriazole	118.042	8.45	0.988634	0.701277	0.158505	130.036	79.6881	327.781	897.982	315.864	3599.92	202.342	5289.39	9726.52	7481.44	7959.2	5118.48	2842.47	2980.66	5807.73	855.816	2074.89	1817.21	548.919	6994.15	1988.05	2141.88	1351.9	2659.36	2294.67	3798.94	1107.81	4318.05	3436.39	2463.08	1543.03	5933.53	2501.88	4298.56	12398	12701	10429.9	3806.41	1777.54	9728.41	7906.54
Neg01002	Negative	[M-H]-	Threonine	118.052	9.71	0.239267	0.844263	0.584401	11941.7	11395.4	16318.2	25643.3	10282	13891.4	6265.1	20496.8	3429.61	5244.35	1859.69	1917.53	994.284	1127.17	1746.41	817.524	1678.32	931.142	712.192	804.297	9136.62	10589.7	18332.3	20635.1	17055	18228	2485.04	9079.46	16157.7	2947.46	887.535	16040	21267.4	23723.2	2722.97	897.748	2559.99	1461.41	2558.77	2684.11	6255.88
Neg01049	Negative	[M-H]-	Benzoic acid	121.028	1.48	0.466561	1.12803	0.531574	34914.8	103955	99643.9	25944.1	65728.3	117585	71347.2	39099.6	10530.6	57813	37037	24189.4	12374.7	54744.2	21956.4	28440.1	22226.5	27029.3	41523.5	73311.8	17381.4	23362.7	19601.6	31367.9	56649.4	62584.7	13180.7	110349	63541.9	26489.5	104057	45337.8	68484.7	44013.1	21131	23954	18411.1	18304.9	39621.4	51033.4	20704.6
Neg01052	Negative	[M-H]-	4-Hydroxybenzaldehyde	121.029	0.95	0.155808	0.995796	0.977104	20378.1	30538.9	35146.7	26340.8	33991.8	20696.1	15157.6	11590	37541.8	29572.2	50526.4	26675.2	29262.8	27953.1	27145	23673.7	15256.6	28269.6	32232.9	27770.4	16447.6	9699.42	25134.9	11823.5	26941.3	22855.3	18866.7	19546.3	15409.8	21945.7	16077.1	16596.8	10812.6	23473.2	38376.5	30363.7	30673.7	93199.3	30500	30913.6	32024.4
Neg01095	Negative	[M-H]-	Taurine	124.009	9.15	0.412689	0.770635	0.406198	5389.67	8313.62	9581.43	23960.5	5141.01	12547.7	3576.2	11434.8	1757.37	1645.96	3648.1	3564.6	1128.33	933.181	1451.93	605.006	1031.08	502.078	1204.01	2602.92	9655.15	10567.4	18098.4	10374.7	23913.5	8010.98	1410.2	12379.1	13145.5	971.445	889.468	7906.15	9668.93	10609.8	1211.41	2404.53	917.253	1070.28	8731.29	4964.16	4993.51
Neg01219	Negative	[M-H]-	L-5-Oxoproline	128.035	9.25	0.206571	1.02206	0.948357	52993.3	48438.1	33511.1	61022.7	48142.8	43772.1	79250.5	43926.5	502.407	429.281	302.48	1568.06	717.742	526.811	660.146	228.792	202.691	319.996	343.575	564.187	39426.4	33512.9	35132.9	52476.5	41729.1	41630.5	29712.2	39709.9	52903.6	22329.8	39609.4	18611.6	44121	33625.2	817.253	813.502	280.423	608.919	925.211	503.586	456.911
Neg01285	Negative	[M-H]-	Citraconic acid	129.021	11.24	1.00965	0.54888	0.0924878	164260	94097.9	70725	203308	56702.6	113160	42969.9	205700	2051.67	2704.24	580.518	1613.64	1869.3	6864.17	3778.53	1770.03	1783.09	2746.55	2711.54	2415.84	163915	139048	146269	195548	159896	170439	171664	198354	181266	119348	181374	151641	147495	182815	353.48	2654.63	2670.35	1252.51	1385.59	682.414	837.068
Neg01300	Negative	[M-H]-	Ketoleucine	129.057	1.45	0.763715	1.51829	0.243587	172540	6307.62	6804.35	39806.2	12311.5	7325.01	59403.1	36169.7	15568.3	3.04582e+06	1.76005e+06	1.71338e+06	877701	2.34526e+06	906009	1.31055e+06	1.46776e+06	1.41805e+06	1.51439e+06	1.31828e+06	31342.9	12004.6	14028.9	51948.2	8017.62	436089	27847	19610.7	30283.2	27293.6	56963.7	1.23112e+06	36337.4	1.35366e+06	116738	1.36887e+06	1.32474e+06	34059.5	1.97223e+06	2.76948e+06	2.41316e+06
Neg01339	Negative	[M-H]-	5-Aminolevulinic acid	130.05	10.13	0.327965	0.92539	0.556621	4633.41	6315.28	6295.38	9839.13	3694.61	7472.8	5731.52	6859.66	8147.83	9021.8	5977.3	7863.59	8276.2	6264.73	5307.5	6062.51	6234.46	5442.63	4879.17	4822.84	4770.02	6939.02	22499.9	7044.37	8195.27	3269.06	8762.65	10203.5	7136.12	4575.19	4303.29	5191.24	4122.66	4114.03	7218.76	7015.25	6972.57	5404.71	9648.5	7969.65	9073.2
Neg01346	Negative	[M-H]-	trans-4-Hydroxy-L-proline	130.056	8.53	0.523623	0.700634	0.393916	3198.44	1006.83	2933.56	38777.9	5126.71	24612.7	4790.25	19587.3	468.773	921.693	1558.23	2711.69	1550.53	1732.13	6955.43	531.295	752.012	573.288	1478.47	1185.82	14058.3	3032.19	2722.14	20658.7	8346.41	29373.9	4231.54	10102.9	8649.25	18233.6	12933.1	15408.6	36395.1	24374.6	628.308	1253.16	810.512	1178.73	4659.83	2064.11	935.493
Neg01357	Negative	[M-H]-	L-Leucine	130.089	8.12	0.227603	0.870125	0.656228	9186.96	15160.7	13111.3	2242.81	25572.1	16471.8	6890.11	6701.4	674.781	129.703	517.374	656.397	339.872	4620.86	115.062	493.961	1019.33	722.018	147.246	6782.02	11569	22478	10612.5	1744.55	9167.9	4842.49	1706.94	9541.93	14412.5	3286.8	1707.39	12888.9	15008.4	7855.99	4992.11	3271.56	3801.08	3634.85	6376.93	8380.45	689.881
Neg01394	Negative	[M-H]-	Asparagine	131.046	9.47	0.275336	1.06229	0.695388	33417.1	50113.1	25193.1	34929.6	59428.1	21103.3	34735.3	45500.9	33730.7	29883.3	46324.3	74383.5	68023	49534	52821.5	24219.4	8693.18	9946.01	43178.3	7683.54	25787.6	52691.4	32138.3	44110	42945.2	16890.3	42161.9	26789	13916.1	37589.1	72512.9	20685.4	49291.1	23712.2	46749.7	19424	51319.2	67738.5	56699.2	43409.6	53274.3
Neg01396	Negative	[M-H]-	2-Hydroxy-4-methylpentanoic acid	131.072	1.12	1.45907	1.44712	0.0544766	223492	354021	217757	208116	228415	215487	248170	207845	84776.5	215965	82885.7	82313	104716	76739.7	80528.1	19287.4	34463.3	31814.8	15615.1	51673.9	115952	88715.3	98083.3	151707	106845	111799	157443	176912	55281.2	46435.9	169104	112333	138731	126725	96162.8	93431.6	104296	60778.2	55670.8	122105	153508
Neg01399	Negative	[M-H]-	2-Hydroxy-4-methylpentanoate	131.074	1.54	0.554801	1.22737	0.427182	7065.32	41198.8	15250.9	34787.8	20549.7	33464	17816.6	9557.28	1991.76	13012.7	15374.6	8261.68	2379.1	38442.5	3593.26	23400.9	6329.44	17559.2	13263.2	89901.6	3145.59	6116.94	10606.1	26839.3	21585.5	14977.3	5537.18	19746.4	4137.91	5195.66	26137.8	2796.86	32806.3	24905	6171.88	12395.6	4605.26	2929.04	14415.9	34057.4	24077.2
Neg01408	Negative	[M-H]-	Aspartate	132.03	10.27	0.283661	0.905261	0.699539	4819.33	9075.25	10918.9	27821.7	7011.89	11231.1	2095.36	15159.1	13572.4	6092.58	15807.4	57672.8	10662.7	48357.2	38810.2	2219.95	2697.65	3411.78	16129	1894.37	10297.4	15572.5	14797.5	12689.1	13272.4	10988.1	22227.8	11427	17164.7	54608.6	30315.4	11387.5	14384.1	19672.7	12805.7	8909.03	4926.39	7747.05	28698.4	17555.5	44554.2
Neg01421	Negative	[M-H]-	5-Methyl-1H-benzotriazole	132.05	1.06	0.0971737	0.862494	0.857731	20083.8	53988.7	111406	8564.48	21987.6	20776.1	29162.7	7259.42	12232.3	10796.3	10404.5	13845.1	25559	3430.25	8628.71	540.868	603.177	1381.84	523.877	1104.8	7738.1	7971.38	4170.34	353262	4217.37	5684.89	3277.28	12249.4	7938.01	4221.53	9223.4	12872	5861.76	7471.81	9926.36	7022.27	13359.9	16896.8	9492.08	7995.8	10073.7
Neg01450	Negative	[M-H]-	D-(+)-Malic acid	133.015	10.35	0.899892	0.157134	0.180892	5915.52	3693.24	4383.05	5075.67	5308.23	1892.71	3068.1	5664.49	585.441	161.841	9881.02	35739.2	5892.88	35522.5	3899.45	294.845	200.732	270.419	441.739	1035.57	6851.66	5214.33	12391.8	5984.03	3917.04	811.046	521807	8679.32	4305.2	209755	214723	5666.01	1987.27	2831.42	12949.5	4845.03	397.115	4033.09	10437.7	3700.56	16949
Neg01533	Negative	[M-H]-	Hypoxanthine	135.032	4.14	0.518788	1.3771	0.385292	7072.16	4559.08	2828.14	4038.77	1958.07	4085.53	9782.85	13584.7	18675.3	11948.7	7650.61	58263.3	37373.3	125821	40012.5	2726.36	9316.92	10769.9	37767.2	7559.81	3338.15	8067.57	46374.6	4218.68	5111.49	9105.35	12060.7	12970.2	9488.92	16350.7	13316.9	5252.69	2640.39	6225.5	9780.81	16451.7	12507.8	38105.9	9425.42	33548.8	58161.3
Neg01571	Negative	[M-H]-	Salicylic acid	137.025	0.74	0.830241	2.42415	0.232171	22698.2	18483	30953.1	42636.2	55896.5	687433	31668.7	30344.9	7021.09	14771.2	12287.6	14436.7	22150.8	20188.9	13541.3	51590.2	36172	54883.3	12486.9	43934.4	15962.5	4435.88	30704.8	10468.3	7835.07	22841.2	11440.8	13073.8	7178.21	10850.6	13679.4	5438.26	22503.4	21180.2	15357.8	11442.6	22847.2	10104.5	10062.7	44039.8	8393.25
Neg01583	Negative	[M-H]-	Urocanic acid	137.037	7.15	0.751697	1.48259	0.240159	1571.84	1609.09	1391.84	4479.88	1189.13	3621.03	1596.25	1554.86	11504.9	7944	6638.27	19084.1	8208.65	2064.03	18440.2	2091.67	1216.14	1362.91	719.204	2555.78	883.217	1303.02	1131.78	4187.5	1215.06	18720	985.351	422.254	2298.84	562.274	809.223	1637.62	3242.53	4408.47	4320.41	5651.51	3426.58	5027.81	4289.21	4325.61	4296.41
Neg01594	Negative	[M-H]-	4-Nitrophenol	138.021	0.9	1.03755	1.33349	0.103965	36512.9	20918.1	25379.2	29729.4	62888.4	26187.2	23693.5	18996.4	61580.6	93190.8	59783.1	54775.7	43667.2	55172.6	39924.7	20181.6	24333.7	22733.2	21316.7	60138.2	9767.03	7831.57	24569	16219.8	15438.5	16903.3	12785.1	15948.1	11662.6	16680.2	20431.7	19622.6	3303.13	29255	68589.5	36910.3	36608.7	62785.4	55636.2	68044.9	72654.2
Neg01789	Negative	[M-H]-	4-Hydroxyquinoline	144.046	5.39	0.639305	0.650876	0.326065	181.367	579.271	52.7086	392.419	267.269	346.871	257.798	151.067	643.249	296.135	286.185	364.665	423.257	562.667	625.043	166.568	212.483	329.911	259.434	459.598	581.998	251.657	326.51	74.6586	3760.99	302.791	208.186	133.714	398.25	162.057	104.416	266.31	568.478	409.387	361.616	287.841	226.147	211.566	205.306	2619.15	670.015
Neg01790	Negative	[M-H]-	Indole-3-carboxaldehyde	144.047	0.92	0.360001	1.13584	0.495885	9197.23	35271.2	34128.8	12458.6	34156.2	18617.9	17443.4	9416.49	29774.5	40279	35798.6	33730.5	36767.4	36023.6	33470.5	19099.8	22198.1	15760.9	12855.5	65595.9	9831.58	10155.8	19593.4	6323.3	21568.8	14299.3	4984.22	9133.75	13490.8	6424.96	7159.25	8661.7	6030.09	11412.4	32738	40012.5	30853.7	68892.3	44874.9	54537.5	43104
Neg01801	Negative	[M-H]-	(S)-3-Amino-5-methylhexanoic acid	144.105	5.87	0.405092	1.11727	0.444658	9271.37	7797.18	7517.56	3980.05	13296.3	4801.9	1369.93	4726.23	10308.8	16486	10449.3	12115	9864.74	10349.6	5915.96	5736.07	8779.35	7093.99	4835.09	8402.4	4179.41	5213.22	2747.82	9241.6	5662.1	2799.73	2649.9	4415.57	4747.7	3317.24	2380.29	9723.32	13958	9554.03	7642.76	7789.26	10383.8	12016.6	6322.72	13714.1	11115.8
Neg01849	Negative	[M-H]-	Glutamine	145.063	9.26	0.363241	1.10317	0.773952	1.20563e+06	1.12531e+06	1.38289e+06	1.36206e+06	1.16525e+06	997542	1.78103e+06	994872	2433.21	4312.33	2685.66	4345.59	1625.48	2598.2	4385.05	3639.61	2156.16	3601.08	1808.03	410.987	857771	758594	791894	1.1602e+06	1.02526e+06	919498	585084	872342	1.18398e+06	589227	804955	434567	1.05171e+06	783336	1778.25	2458.06	1803.75	1020.5	2619.21	1096.59	1805.97
Neg01870	Negative	[M-H]-	N-ACETYL-DL-SERINE	146.046	7.45	0.759213	0.768628	0.349253	2073.74	12095.7	16606.5	4141.89	6397.32	1919.85	10154.6	6658.24	5368.82	5657.56	4532.11	8324.49	4950.31	5552.2	4935.98	60104.3	56488.1	43044.4	46342.6	48061.9	15281.5	25656.7	24181.9	4020.22	21597.2	29915.7	22440.7	25935.4	3984.66	28336.6	49163.4	53807.9	9837.26	27422.9	6340.04	7558.46	15185.3	9132.9	7301.25	7362.31	9315.2
Neg01874	Negative	[M-H]-	DL-threo-beta-Methylaspartic acid	146.047	7.06	0.381644	0.913916	0.720868	14982.7	8517.43	13788.2	31213.1	14206.7	7300.88	8540.32	25758.4	64195.7	12584.6	61320	114572	39862.1	21954.1	36755.6	5080.33	13936.7	9762.12	1666.79	10902.2	27475.5	17292.8	12758.7	19804.4	23914.5	18589.2	19593	23348.6	19883.4	18894.4	5211.12	23767.9	20710.5	33765.3	39693.7	16865	22939.5	93245.6	52890.8	22663.1	56625.3
Neg01875	Negative	[M-H]-	L-Glutamic acid	146.047	10.15	0.880853	1.2032	0.214767	27622.5	33182.4	31429.1	61233.2	24160	28336.3	44729.5	44460.9	68993.8	45806.9	43118.2	80160.4	55125.8	89155.1	44617.9	18257.4	11560.2	22691.8	18189.4	30810.8	25384.2	39315.5	74162.8	35366.4	37236	22897.5	28884.1	24957.2	28774.4	56440.5	14713.9	13232.3	32754.3	25790.3	39103.4	36245.2	48458.8	41257.2	29008.6	67415.6	62825.2
Neg01915	Negative	[M-H]-	Citramalate	147.031	9.61	0.128839	0.83563	0.76008	397638	128833	64612.5	698628	65555.3	134581	91376.1	550010	6406.22	15109.8	3475.98	6767.57	5373.57	22968.2	5726.79	3960.3	3272.43	4561.97	4969.32	2361.33	121264	179657	185116	533599	61459.6	29634.6	54505.1	292375	181496	1.26731e+06	49233	284993	146157	31297.9	4304.14	3546.24	2986.05	2745.92	1474.47	1973.86	2327.9
Neg01926	Negative	[M-H]-	trans-Cinnamic acid	147.046	6.23	1.41268	1.27558	0.0502356	301087	520221	189026	197494	266246	121519	306584	188149	235924	191621	197962	255745	193714	220442	195616	124578	89361.2	107860	113989	117041	211367	147630	251202	169696	255559	90857.7	215997	146342	176824	194839	226827	97563.4	263025	103527	135211	171444	122392	186915	128357	155610	131605
Neg01939	Negative	[M-H]-	Methionine	148.044	6.71	0.397446	0.759725	0.484047	79882.3	82466.5	105335	17418.3	60675.9	36564.7	152440	14149.9	916.525	665.731	660.975	347.445	680.8	960.763	907.823	478.644	564.988	233.462	380.637	1403.84	61983.4	73019.7	111960	60307.1	53346.8	18030.1	40916.5	23477.3	57736.5	80760.6	120963	72362.8	89610.7	80195.4	1684.23	852.115	386.26	1175.17	367.062	468.158	791.015
Neg01971	Negative	[M-H]-	Ribose	149.046	2.81	0.208591	1.20182	0.608638	1108.73	9167.2	2427.89	2015.09	5811.32	5249.81	1614.24	979.365	114143	72999.7	35690.6	70244.6	94321.9	115774	173535	178397	262925	127412	92902.5	87354.6	645.469	1526.72	753.909	866.607	1265.11	1070.58	3706.84	924.937	863.414	1385.09	2387.06	5162.31	114158	1688.97	60908.8	81207.1	143830	79604.9	84908.7	68408.4	52469.8
Neg01985	Negative	[M-H]-	Benzisothiazolone	150.003	0.94	0.568661	0.796737	0.488796	10093.8	12157	11834.7	4096.06	14259.6	10109	4592.41	3761.25	27319.2	29897	12278.5	13866.4	20801.9	18350.1	71296.8	11991	8492.45	11616.3	23641.6	4865.56	8796.67	9303.48	15940.3	7119.03	36812	34222.9	2391.78	9329.8	11176.9	10020.7	15973.7	10953.7	12693.1	9126.5	44743.7	21176.5	51833.9	116768	9324.1	9425.58	13459
Neg01991	Negative	[M-H]-	Paracetamol	150.057	0.67	0.433881	0.943684	0.627752	328.513	879.634	858.162	221.989	818.959	1180.87	0	956.756	1400.01	216.936	678.289	1008.91	1307.77	1943.59	2146.21	441.31	907.702	465.12	659.103	461.072	568.013	397.059	278.818	290.129	499.568	1167.91	781.875	146.783	3607.99	384.996	281.343	562.745	813.76	1713.17	1151.75	862.645	571.7	1512.96	700.352	506.96	810.881
Neg02020	Negative	[M-H]-	Xylitol	151.062	5.93	0.919538	1.20579	0.174253	22099.4	28882.3	14007.3	18889.1	18941.8	18173	13603.4	25095.6	20007	38294.4	44421.8	59014.9	22637.4	37243.6	42039.7	25956.9	35780.3	10064.1	16681.9	31732.9	15054.5	33274.7	16820.8	20452.7	16780.2	10928.6	17187.1	27530.9	22621.5	22637.8	11282.7	17596.9	18298.1	12307.8	37791.6	37480.8	17247.8	20471.2	43175.6	41455.2	35015.1
Neg02051	Negative	[M-H]-	Gentisinic acid	153.021	0.95	0.0859795	0.969761	0.854024	4287.78	11628.3	13743.8	11324.3	8676.97	10262.9	3597.19	12736.9	13641.7	28624.1	14113.7	8231.3	4215.68	5061.24	11917.7	1605.37	2441.1	6105.16	7406.4	4058.31	7535.86	16928.1	7526.25	13082.3	6841.82	8789.58	5621.96	14208.8	11690.6	4626.22	5943	10460.8	1950.71	17220.5	11426.2	10773	10377.4	12210.4	7758.08	5983.99	6685.71
Neg02082	Negative	[M-H]-	Histidine	154.063	9.71	0.409889	0.838782	0.450858	167040	62805	56508.5	65312.1	43700.7	55508.4	60668.1	59050.7	17431.9	97845.2	47651.3	14131.8	18186.3	21556.9	31427.6	39045.9	8727.46	18474.1	49529.9	38993.7	46341.5	71189.9	34833	162414	154859	24575.8	22666.8	33689.8	99689.8	59835.6	152288	65958.1	136036	34377.4	16728.4	40489.9	39714.2	69696.8	24313.2	40628.5	34137.4
Neg02212	Negative	[M-H]-	Allantoin	157.039	4.49	1.00967	0.490664	0.223835	7197.63	8350.4	65014.4	3921.33	7302.03	3367.66	3180.51	5917.29	200748	16067.1	24141.4	36494.8	61532.7	20405.9	53902.8	6605.29	15251.8	54996.9	28452.6	26561	2608.77	20942.3	14801.2	8736.94	6837.9	26346	11412.5	14082.2	32677	9303.48	5891.76	36637.5	8358.83	54146.9	96166.4	30038.1	51298.3	134705	53176.1	42818.3	47311
Neg02263	Negative	[M-H]-	Indole-3-acetaldehyde	158.062	2.72	0.232207	1.16178	0.598692	19852.2	4968.25	5961.01	8293.8	3520.24	2862.44	10614.7	5582.28	11014.1	78634.3	47846.9	22974.9	45676.9	136280	55194.9	57188.4	44404	85240.5	62678.9	51523.6	1838.51	6743.29	5097.6	5491.66	6634.73	2687.27	6282.32	4015.43	2787.75	4322.7	4668.74	5331.02	82812.1	9119.44	36715.8	67375	62798.4	21765.5	57152.4	108851	35635.4
Neg02403	Negative	[M-H]-	Acesulfame	161.986	0.62	0.194716	1.46854	0.703224	22421	2160.77	449.67	7178.13	267.269	19687.2	190.351	4684.1	26793.7	2040.81	2999.34	1198.33	1784.86	10039.7	5832.11	974.52	662661	455.205	6735.27	5419.43	311743	136.454	5993.67	4488.97	338.607	3100.36	1256.65	1571.39	145620	703.738	21902.2	409.708	24692.7	16771.7	2018.72	131833	492.097	6843.01	1142.96	632.646	1050.17
Neg02474	Negative	[M-H]-	2-Deoxy-D-glucose	163.061	5.03	0.440059	1.12795	0.449273	611002	1.16502e+06	487790	432163	526471	52597.7	483387	141517	770621	1.089e+06	347334	426412	809052	431936	147953	231495	836405	406533	357951	167832	317897	753684	397757	300093	252170	256498	461377	289933	714024	331326	438644	169484	115536	352193	739449	315592	397948	586254	567148	826437	393654
Neg02560	Negative	[M-H]-	3-(2-Hydroxyphenyl)propanoic acid	165.057	2.83	0.114694	1.10571	0.825345	325.091	1652	410.139	399.58	265.84	671.12	1268.01	477.864	12942.8	46028.4	24587.5	31810.9	12164.7	17262.5	26642.8	27167.8	15798.1	3031.4	18285.6	28561.4	2818.55	1832.06	267.812	139.867	421.05	516.907	1056	974.2	500.78	287.404	584.922	1236.35	12555.6	1079.93	104784	62616.8	12920.2	29247.7	10601.3	11604.4	10397
Neg02589	Negative	[M-H]-	Pyridoxal	166.05	2.48	1.21509	0.714239	0.114195	1750.93	2717.06	2620.6	1566.81	2070.98	2039	2039.91	523.081	649.556	3606.42	7404.15	3252.61	1651.86	3027.55	2837.56	1519.22	3632.77	2060.59	2571.3	4238.03	3474.78	2516.57	1483.97	640.741	3448.88	871.605	2983.37	741.96	1224.97	1747.7	3393.52	4315.18	6794.8	2101.38	4671.18	9719.02	2642.31	4770.02	3431.55	2347.54	1346.35
Neg02605	Negative	[M-H]-	Vanillic acid	167.022	8.13	0.180798	1.11447	0.893235	317904	312027	367212	525.613	419672	613547	515045	85752.5	0	298.431	71.2917	149.918	141.437	170.087	36.0789	168.483	139.044	91.041	109.183	271.045	146221	136353	126401	43752.8	138491	28380.1	463140	385386	185255	322147	527526	161439	243237	323811	160.015	157.962	60.6075	265.791	159.979	133.277	61.403
Neg02608	Negative	[M-H]-	3-Hydroxymandelic acid	167.035	1.06	0.577439	1.17595	0.502259	11359.9	21514.3	13379.7	29133.6	18092.9	11807.2	67038.1	23506.8	18674.2	29325.4	21436.4	12045.1	16171.4	10522.4	30308.2	1927.98	10185.5	10665.3	5773.66	76368.5	10321.1	17092.5	7075	12366.9	24412.1	67744	39404.6	32254.2	31846	1019.79	18267	27844.4	18892.5	25213.6	5849.14	30674.4	25156.6	12798.9	6667.56	7914.82	7210.34
Neg02642	Negative	[M-H]-	L-3-Methylhistidine	168.078	9.56	0.0880173	0.95508	0.924576	76881.2	2775.29	8999.99	1967.83	1363.5	13401.3	3282.43	18798	4270.46	8191.93	34062.1	21421	9303.21	7726.56	5240.22	2856.55	779.429	370.474	1481.48	15679.4	5601.6	6567.69	16618.1	2301.19	2528.26	1704.28	2665.91	3569.05	4768.21	6260.22	3056.1	8947.29	38547.8	31134.6	7605.69	4557.19	5841.84	37271.2	3748.84	3038.39	4640.44
Neg02727	Negative	[M-H]-	rac-Glycerol 3-phosphoate	171.007	10.94	0.872276	0.371453	0.153777	11105.6	3918.51	5414.16	9220.43	4367.78	4397.72	3899.95	9608.67	103.004	109.042	212.857	315.03	104.495	168.248	156.017	83.2841	133.169	265.011	213.357	32.4076	9130.17	16158.6	69440.3	11378.3	9762.67	7341.59	6509.34	5980.92	14727.7	6943.37	8452.85	4051.28	7318.07	8824	196.177	278.188	124.833	56.8917	159.09	110.502	260.06
Neg02728	Negative	[M-H]-	Glycerol-2-phosphate	171.007	11.11	0.865122	0.684924	0.20905	16729.1	1302.59	3905.38	12008.9	1659.36	1217.06	1088.15	8404.24	15665	12161.1	11488.1	17046.1	16825.8	25514.9	15457.4	7857.42	7839.34	12241	7403.39	5837.78	13661.4	17371	85854.8	13734.3	12447	8451.1	9563.36	10980.6	16198.7	10933	14084.5	8823.17	9751.65	4772.48	9111.82	10053.4	7849.12	15082.5	26902.2	10033.8	18712.6
Neg02730	Negative	[M-H]-	P-Toluenesulfonic acid	171.011	0.76	0.431033	1.28558	0.603003	15401.3	12576.9	32995.6	24335.7	24211.5	109006	19480.3	10583.9	2429	3840.58	7721.9	1870.93	2460.38	8552.17	7304.51	7702.34	6388.19	8584.9	4137.93	10034.6	3990.08	2337.61	7492.31	32625.8	2844.3	9345.42	3523.15	3922.94	12790.4	5270.87	10140.9	21456.6	1075.39	10813.5	6190.87	6098.19	6823.32	6026.97	4365.64	10582.1	11194.3
Neg02754	Negative	[M-H]-	FA 9:1+1O	171.103	1.1	1.28735	1.45103	0.0669762	134686	181401	179272	129544	165856	136827	149642	81696.3	92633.2	184589	66455	85845.1	88538.8	100182	62333.6	8047.92	3853.08	8969.79	11228.8	4522.33	65722.8	48143.7	53787.1	151067	84875.5	47484.1	20998.5	37239.8	60881.5	79304.8	26072.1	113895	117786	42713.3	109254	54273.8	70071.3	140251	121994	86428.7	65926.1
Neg02768	Negative	[M-H]-	Sulfanilic acid	172.007	1.03	1.06591	0.32007	0.160161	1379.07	468.934	1558.2	1152.91	2332.53	2090.27	2637.94	636.125	1241.3	1430.17	1503.24	906.597	1755.3	421.081	1670.36	462.37	322.151	268.616	188.315	241.584	1762.13	4828.46	705.299	2275.67	1136.54	2058.98	3748.29	3780.18	2839.55	2791.67	2922.68	39430.7	1375.5	7387.11	2675.96	365.067	1878.83	2448.12	1572.24	416.703	723.292
Neg02874	Negative	[M-H]-	(-)-Shikimic acid	173.045	9.06	0.552249	0.177958	0.419507	400.375	579.271	606.149	1304.72	190.09	104.061	400.187	542.607	454.058	510.776	318.776	2456.42	468.644	195.83	5978.37	241.237	150.794	102.759	634.061	284.303	398.04	479.826	2747.82	383.688	279.719	110.302	505.864	491.624	106.848	102924	488.241	433.808	629.077	386.195	3750.86	160.594	180.918	271.125	283.518	168.706	183.306
Neg02923	Negative	[M-H]-	Citrulline	174.088	9.89	0.63853	1.21376	0.418074	3501.86	37300.2	6934.47	22814.8	20222.4	4798.88	26219	24162.5	5493.9	6754.87	30429.3	21302.5	3821.98	12014.6	12799.2	3413.69	2881.73	1787.47	2601.35	4716.78	11179.5	2866.65	6787.01	2193.45	18222	18422.6	7964.76	7824.76	24181	10097.7	1719.96	6551.7	32900.5	5756.62	11954.1	12874.7	13451.2	22252.7	8523.31	10099.6	12098.2
Neg02953	Negative	[M-H]-	N-Carbamoyl-L-Aspartic acid	175.035	10.91	0.508624	0.805419	0.650714	1669.94	349.402	161.42	455.436	165.793	99.5368	316.253	1105.77	28339.8	840.198	833.094	3512.94	15540.2	347.53	3991.11	1389.03	3590.66	1651.36	950.591	642.259	1170.45	602.859	508.109	817.464	452.457	1319.3	1065.42	725.874	483.512	529.146	1741.23	1421.93	627.153	794.573	10040.3	3959.57	7703.48	10560.5	1166.07	2194.86	1758.11
Neg02957	Negative	[M-H]-	2-Isopropylmalic acid	175.062	6.09	0.337491	1.1145	0.799105	33490.1	10731.8	15669.3	25782.2	12455.9	23920.5	5619.11	28053.2	524.48	409.769	217.949	392.015	409.535	396.257	400.768	308.247	173.315	319.996	535.897	534.725	8132.92	22748.7	32696	34611.3	6270.61	8450.02	2459.61	25297	16850.6	7369.55	2039.01	894.126	8275.15	7932.62	295.621	300.127	557.227	260.457	198.196	142.556	300.694
Neg03045	Negative	[M-H]-	Cyclamate	178.055	0.94	0.891793	4.12673	0.264613	20220.7	11853.6	13467	6994.81	12663.1	22530	9334.7	1.71531e+06	32045.8	59569.1	17097.8	31150.5	25879.9	22047.9	30597.8	68129.3	61491.7	9342.97	17900	27023.5	115141	10332.5	13913.4	23961.6	8793.96	5403.73	7128.25	8590.85	10246.6	14033.6	19972.4	18648.9	493.45	13329.3	133463	13683	22744.1	66292.2	16732	16146	46020.7
Neg03067	Negative	[M-H]-	D-Fructose	179.056	9.98	0.517408	1.06629	0.477214	303166	393581	321694	412211	334410	269277	328068	293560	331383	279965	263002	295475	340323	305993	281336	139355	146892	143258	195335	273049	269186	261624	312780	219518	192099	100578	268001	442928	403609	275901	283876	214336	438310	180811	381613	252279	249666	318810	322433	265689	251679
Neg03077	Negative	[M-H]-	Glucose	179.057	7.4	1.08667	1.51877	0.156481	8.58195e+06	1.00034e+07	7.61295e+06	7.61758e+06	1.43184e+07	7.92698e+06	6.20028e+06	3.84465e+06	380099	232909	223214	318413	414004	1.65374e+06	505807	1.80893e+06	308809	1.24014e+06	548862	2.52554e+06	7.04625e+06	3.57707e+06	6.40441e+06	3.47095e+06	2.29211e+06	2.3614e+06	3.73431e+06	1.34726e+06	3.08687e+06	1.60583e+06	3.96075e+06	4.86566e+06	2.33821e+06	3.20569e+06	1.16329e+06	1.93783e+06	2.37165e+06	2.23646e+06	1.56176e+06	1.49116e+06	830986
Neg03080	Negative	[M-H]-	Mannose	179.058	1.95	0.064463	0.91499	0.761779	28499.7	23953.9	69852	119177	50911.3	201705	10049.6	118304	1562.93	8001.39	133839	80278.9	1714.14	18485.3	9973.38	4604.56	15863.7	23955.5	3546.94	21733.7	103001	78161.3	12450.5	21347.6	91582.9	63117.8	38580.3	99836.9	152508	67185.5	5617.19	73475	110871	85045.5	18307.7	57083.8	8592.69	5119.37	74984.7	31333.7	87942.7
Neg03082	Negative	[M-H]-	ParaXanthine	179.058	1.1	0.652279	0.616783	0.341628	5907.53	12032.9	40896.9	362.344	12311.5	181338	10941.4	16461.1	21595.1	115720	11542.1	22330.7	12426.4	29357.1	25851	5257.43	5246.46	4814.36	1981.32	15820.8	40509.7	28682.2	10969.3	15862.6	7057.74	9997.5	15746.8	9856.61	48083.5	6434.81	10002.7	55198.4	21594.5	46276.8	329420	156984	137990	75160.2	53980.4	9024.06	10898.1
Neg03095	Negative	[M-H]-	Acamprosate	180.034	0.75	0.786789	0.775105	0.318633	36568.8	33869	32804.5	73359.5	33854.6	29131.1	34213.8	37324.8	31652.7	24699.8	38749.1	12283.1	23300.2	12528.5	9897.32	32442.5	29479.3	20486.9	14854.9	22673.5	14405.8	10225.1	29549.2	171538	26111	13665.6	9481.41	28660	22738	24192.1	21155.8	61036.8	7780.74	29302.4	29460.9	14722.9	24290	76731.8	22008.6	35929.2	29104.1
Neg03101	Negative	[M-H]-	Tyrosine	180.065	7.32	0.10329	0.991283	0.977859	837697	1.04035e+06	581087	667510	809050	535220	1.63118e+06	253297	69083.1	60054.6	53330.2	72036.5	96770.7	159608	81410.6	11266.3	12019.5	8517.29	7844.13	150155	399268	928050	748783	372745	1.07016e+06	300068	387327	335880	1.10828e+06	380599	426643	720660	457268	438005	127376	170324	125266	262090	147813	127190	83478.3
Neg03131	Negative	[M-H]-	DL-3-(4-Hydroxyphenyl)lactic acid	181.05	4.93	0.86872	2.61297	0.229576	594.29	646.7	345.9	236.311	734.634	654.53	1265.01	1413.04	395.199	421.247	14201.3	288.693	498.198	353.046	229.15	229.749	232.066	284.841	590.989	225.38	485.178	823.198	1025.39	550.016	275.793	181.674	438.038	332.776	820.244	443.194	266.841	245.825	593.487	452.745	308.278	781.032	734.526	324.461	314.625	388.866	477.679
Neg03134	Negative	[M-H]-	DL-p-Hydroxyphenyllactic acid	181.05	4.53	0.354325	1.33852	0.558325	594.29	1181.53	309.663	295.031	318.722	21356.7	392.693	410.038	210.212	272.031	236.281	545.984	170.992	229.848	375.416	18378	19291.9	17585.3	16477.6	19960.1	258.188	177.838	633.76	252.327	406.328	965.686	892.091	737.939	505.097	404.694	402.194	829.055	234.701	23984.4	480.045	195.697	492.097	411.576	108.43	331.506	328.687
Neg03142	Negative	[M-H]-	Mannitol	181.072	7.34	1.19366	2.13229	0.0814319	307128	287322	131272	207197	225342	157205	172139	1.20711e+06	331199	233841	223939	429665	344026	354676	2.59639e+06	160397	89799.9	59090.1	59304.2	200964	59347.7	26265.2	232096	202845	115454	28992.2	214933	173104	137081	101506	140431	82464.5	157463	116728	241608	512396	411836	469425	267669	268016	320714
Neg03152	Negative	[M-H]-	Saccharin	181.993	0.68	0.474963	0.682661	0.471355	6629.58	47963.1	8243.95	10602.5	7940.9	15156.7	4803.74	18458.9	13936	12234.5	8583.52	22414.7	8936.95	12366.7	12025	6735.48	3536.81	5235.31	9107.24	10675.4	9250.65	3473.99	14128.9	22363.6	10088.5	8506.25	179702	7542.26	7586.17	6022.96	7378.72	7915.79	16908.1	7393.16	32895.3	6727.41	12529.5	37264.1	19008.1	7255.18	15908.8
Neg03170	Negative	[M-H]-	4-Pyridoxic acid	182.046	0.84	0.949783	0.306793	0.150371	524.709	3031.21	44006.7	1237.41	4252.01	8698.92	4541.45	26871.4	4022.41	2892.48	12345.7	11433.3	3204.51	6523.99	6302.11	3460.6	5351.23	15212	4402.37	4772.75	2619.53	4969.39	7280.45	8773.8	18927.6	2918.69	243623	193275	73352.4	4382.69	2054.48	6102.23	41767.2	1619.4	3577.29	13030.1	4263.33	3431.28	8257.57	49702.4	4733.45
Neg03194	Negative	[M-H]-	2,4-Dinitrophenol	183.004	0.59	0.520402	1.20842	0.374401	3027.34	22161	9067.52	18735.9	17518.3	30235.1	5075.03	12316.6	36423.5	14351.1	23932.6	27626.4	22599.4	24164.3	15759.7	5436.44	3107.93	3063.85	5097.53	16869.6	10774	3856.5	7381.33	16057.3	11830.6	5638.39	7782.01	9248.36	11931.3	8435.9	2919.78	6620.39	3229.07	12507.5	40845.5	4092.96	10916.6	38069.5	23431.6	13208	32430.7
Neg03441	Negative	[M-H]-	Gly-Leu	187.111	4.69	1.06769	0.445641	0.161216	55.8929	75.0907	413.433	133.193	80.0379	861.144	83.9344	340.157	99.8508	84.938	120.177	124.594	163.603	79.987	176.494	1388.07	6336.29	3871.5	1350.26	4326.41	1333.97	1122.95	358.611	171.998	1729.35	3048.45	403.184	725.874	241.756	1813.96	604.258	1073.67	376.099	4258.23	157.303	107.063	70.558	268.458	58.6589	129.903	186.015
Neg03630	Negative	[M-H]-	Citric acid	191.02	11.97	0.206757	0.949205	0.758188	1.94084e+06	332825	231282	1.71642e+06	93297	543354	60798.5	1.84878e+06	1.84111e+06	3.79323e+06	2.02828e+06	3.56837e+06	2.65937e+06	2.48419e+06	3.75707e+06	2.42364e+06	2.05254e+06	2.19e+06	3.4516e+06	51117.1	1.26595e+06	883870	1.03349e+06	1.85627e+06	1.46199e+06	231795	2.46187e+06	2.34116e+06	1.92036e+06	2.51994e+06	3.16212e+06	1.71961e+06	1.40097e+06	2.43208e+06	1.94657e+06	3.85306e+06	3.70274e+06	2.18119e+06	1.78771e+06	1.1826e+06	2.80968e+06
Neg03644	Negative	[M-H]-	Quinic acid	191.057	8.5	0.613178	2.01144	0.385299	211.024	130.259	1.64714	784.839	0	1345.26	359.719	2209.48	3445.38	1523.15	5266.42	28170.4	6204.25	1976.69	128730	497.79	341.735	244.278	85752.5	545.037	19506.1	2077.01	64208.8	2901.29	354.31	869.442	8187.08	179.961	983.213	1303.62	3219.49	451.883	5967.57	2699.33	40444.1	3788.44	4306.75	4917.58	2357.02	1868.41	1398.72
Neg03703	Negative	[M-H]-	Glucuronate	193.035	9.92	0.326446	0.858602	0.58185	7277.48	16124.6	9663.79	11822.7	8348.24	11908.2	10869.5	15425.2	7237.61	2998.08	6655.59	7706.58	2308.39	14680.8	17809.3	1273.19	1891.78	859.031	1931.23	4868.5	11958.4	10519.3	11353.6	11619.3	9457.44	7743.87	17401.9	13241.7	18405.8	8955.2	3433.15	1859.35	50508.9	9533.87	8050.48	6568.57	2002.76	5556.72	10750.6	6182.22	8459.17
Neg03706	Negative	[M-H]-	D-Glucuronic acid	193.036	9.75	0.952982	0.633953	0.130696	19192.9	25291.8	12931.7	22183.2	20616.9	11930.8	16920.3	25083.2	6071.98	4467.28	7194.35	7342.93	3679.48	7729.31	9610.64	1927.02	1532.42	3857.07	2966.97	1931.2	32495.1	17726.7	15431.3	17483.3	19319.2	17661.3	47374.1	28376.5	16347.7	29799.6	19052	19250.2	72472.7	29515.2	4013.04	6114.87	4872.12	6170.98	7342.14	4858.72	6329.03
Neg03709	Negative	[M-H]-	2-Ketogluconic acid	193.037	9.82	0.354068	0.787159	0.539436	19180.4	25035.9	7319.9	13723.2	32138.1	7119.9	15635.8	25100.7	6005.76	1002.04	7134.26	3004.43	1945.29	8338.87	9193.29	806.037	1306.23	4001.3	1161.94	4675.53	32495.1	17564.5	11769	5485.04	19174	2921.93	47737.7	8341.52	8234.81	32142.7	3079.3	19317.7	73072	2273.81	1328.04	5599.74	1599.31	6254.53	7555.44	2170.4	4912.24
Neg03784	Negative	[M-H]-	Gluconate	195.051	9.23	0.265397	0.836298	0.572821	48260.6	35931.7	67271	84421.8	105621	84719.4	39251.3	53921.6	3555.74	6891.46	3417.93	8642.56	3159.12	3593.9	11402.9	1986.37	4044.02	3347.79	4256.12	3603.13	82508.2	40488.8	53688	51569.2	45314.4	13134.6	129624	52414.8	55832.7	62006.8	55063.9	52237.7	74172.4	63155.4	5301.29	5451.43	3619.26	3729.08	12589.4	5683.69	5865.79
Neg04159	Negative	[M-H]-	Tryptophan	203.081	6.21	1.01586	1.42892	0.197204	506173	630310	477207	426083	349661	317222	526344	289922	64857.8	83225.5	68539.8	114924	96874.1	83834.6	75843.7	18321.5	20995.6	19135.7	15662.2	37066.9	294590	308655	360106	260162	79725.7	114838	275422	119685	317300	106328	305992	183551	354232	187041	57579.2	60699.4	63657.8	61190.6	72809	83665.3	57064.2
Neg04265	Negative	[M-H]-	AcetylPhenylalanine	206.079	4.5	0.870974	0.692168	0.322209	1075.65	1029.82	158.126	515.588	1320.63	938.059	2204.78	565.216	4225.27	588.827	2102.09	3216.14	2873.08	1105.11	1815.65	40.2061	2063.14	32.4503	895.499	237.165	1021.99	135.336	791.512	541.511	70.6658	1319.3	827.092	171.918	1728.99	95.8014	59.9424	897.741	333.776	783.481	2548.49	1037.28	1258.28	11974.8	2109.05	1966.26	2996.11
Neg04280	Negative	[M-H]-	2-Naphthalenesulfonic acid	207.011	0.71	0.0720906	0.976451	0.914784	103074	132832	114832	131144	113828	167720	66156.8	146023	128831	149022	181913	209339	250395	144936	199598	184144	121149	103722	141079	153491	97539	144144	73625.3	755233	70350.7	59865	56649.2	70571.7	113935	76078.9	89895.3	110132	18818.4	270907	198269	215390	181657	76797.6	90720.4	64275.1	114453
Neg04496	Negative	[M-H]-	3-Indoxyl sulfate	212.001	0.63	0.133743	0.90133	0.804825	92064.7	116807	2.58444e+06	85206.6	132457	765449	26730.1	190812	129722	181067	273613	269585	278290	329662	91144.1	63170.5	40672.3	779441	567241	125680	138804	38521.4	173787	593914	236685	611295	156021	40043.7	2.58184e+06	451778	760547	138698	518330	409131	311625	83835.4	118504	356236	213877	153843	422747
Neg04574	Negative	[M-H]-	Tridecanoic acid	213.184	1.08	0.911804	0.586004	0.252351	30760.5	355.532	334.37	711.797	1812.29	34397.5	634.004	564.188	30756.2	6411.67	30659.5	15462.8	36865.6	21157	12439.4	2216.12	2294.23	1607.19	2091.5	17192.2	648.697	247.183	905.241	499.929	268.923	514.744	223.258	301.61	112.244	246.219	342.252	13416.7	7497.94	229.902	51471.5	65604.9	38386.2	116766	65688.2	76220.3	56821.3
Neg04580	Negative	[M-H]-	2-Benzothiazolesulfonic acid	213.964	0.62	0.550102	1.23191	0.343925	32586.7	113369	50303.7	65061.4	29598.3	65673.2	17229	75670	285335	87455.2	95508.4	53391	80359.7	119844	63291.2	154400	28268	20623.9	47676.8	46854	72068.8	16019.9	38563.1	71739.3	38876	63353.5	49237.4	114319	41176.2	34305.9	22847.7	14234.9	44418.2	61553.2	141017	45553.5	81891.6	196380	31962.9	43709.1	68353.3
Neg04801	Negative	[M-H]-	Pantothenic acid	218.103	6.81	0.665934	1.16176	0.452958	61495.9	73265.6	49485.1	106851	44532.5	39243.2	57829.3	222498	36592.7	36145.7	116049	115626	46483.3	58719.6	43161.1	16570.7	21975.8	26186.5	44543.5	36929.9	107105	95334.4	86339.1	75069.7	71384.2	34030.4	56715.1	56705.7	79062.8	45281.8	42430.5	43172.3	146035	56073.9	32073.5	30430.4	22248.4	63023.6	63247.6	32240.5	37376.4
Neg04803	Negative	[M-H]-	trans-Zeatin	218.105	2.82	1.20019	10.4939	0.07754	2591.6	1800.65	879.574	1548.2	1244.88	1360.34	2294.71	733.753	5927.99	31044.9	178719	3041.91	1643.42	21144.1	59595.5	440.353	1810.51	623.766	419.702	3075.77	1472.75	673.323	771.335	760.761	1490.85	784.011	658.47	1020.45	1203.38	539.89	1038.36	1935.27	853.197	2421.03	2167.89	2032.44	4153.87	4205.54	2710.75	2321.39	1182.01
Neg05055	Negative	[M-H]-	Carnosine	225.1	10.71	1.15976	1.53224	0.0798275	455.128	629.843	609.443	40.1013	74.3209	152.322	146.885	67.8259	428.833	929.727	1062.25	179.294	1022.78	687.704	663.072	111.045	247.733	664.329	263.441	135.523	125.867	173.364	1051.99	50.0874	215.923	68.1279	168.621	76.4078	161.89	135.196	496.942	122.912	595.411	334.769	483.662	237.82	422.443	248.012	149.314	447.913	546.306
Neg05143	Negative	[M-H]-	Myristic acid	227.202	0.95	1.01015	1.47707	0.187541	422611	795865	650159	362179	965137	1.03748e+06	10052.6	364889	104277	6011.09	104421	42254.5	173679	52830	14313.6	100810	128434	86351.1	86677.1	640546	305666	283572	453854	391792	451463	216211	96112.2	294972	585849	214011	144534	9878.77	167629	5588.23	134966	8364.06	106438	293816	6875.53	153752	7677.18
Neg05230	Negative	[M-H]-	alpha,beta-Dihydroresveratrol	229.086	4.82	0.2824	0.903081	0.776713	6785.85	594.596	472.73	522.749	618.865	345.363	702.95	338.102	13360	5819.4	9654.93	14648.4	14042.4	10183.2	12785.6	135.935	915.536	127.097	194.325	372.687	608.893	1693.37	357.694	10783.9	338.607	189.244	335.358	1425.61	4855.63	425.287	511.444	448.268	6425.43	820.79	11165.8	11425	14534.9	11661	7494.12	9280.49	16520.1
Neg05297	Negative	[M-2H]-	8-Methylsulfinyloctyl isothiocyanate	231.077	4.74	1.04083	0.64609	0.197721	1574.13	1222.91	6259.14	4574.41	4559.3	390.607	3811.52	9398	9103.24	625.557	23515	26378.4	10953	6826.47	6132.44	1040.57	8491.47	786.018	678.135	6365.14	4092.28	586.081	3477.89	3342.63	2254.43	288.733	6094.85	4847.88	5195.6	143.254	5301.04	469.959	3127.11	532.404	9452.65	3958.69	3276.42	32769.6	30236	15408.7	24529.6
Neg05764	Negative	[M-H]-	Pseudouridine	243.061	5.92	0.422343	1.11274	0.436055	82408.9	72166.8	48883.9	41491.9	71915.5	59699.5	55350.2	61413.3	99807.7	167995	117706	163333	108184	159135	130220	68532.3	70774.4	62744.4	83387.6	36211.1	61052.8	71886.7	63626.4	35185.9	33211	45812.2	41825.6	91136.4	42148.6	53904	26643.4	73820.9	131991	133966	124671	118333	104616	140262	111711	107643	106845
Neg05767	Negative	[M-H]-	Uridine	243.063	3.82	0.139824	0.990824	0.952716	35472.6	29378.9	37246.8	26614.3	42497.3	40852.3	45447.5	16124.1	105542	107604	38274.5	72312	159848	131636	59186.9	50153.3	61032.5	63076.1	118016	84657.4	24260	57769.3	91199.1	27377	69646	119448	46809.8	63677.9	33085	31532.1	14298.2	65472.5	62981.7	47785.3	100110	115164	93177.2	88854.2	108211	49626.4	95922.4
Neg06186	Negative	[M-H]-	9-Trans-Palmitelaidic acid	253.217	0.97	0.496278	0.705465	0.440888	79380.4	312932	173930	50835.5	171727	171683	97399.9	40013.2	51286.5	2366.79	27512.5	11851.6	52744.6	10543.6	7129	18988.8	25621.3	13015.3	15054.2	107297	68992.1	65880.5	75676.1	823697	53563.7	52480.1	9217.64	55570.6	81595.9	44629.1	14768.1	50951.9	38563.2	64453.2	138698	280829	85685.4	177948	117928	92483.6	48135.5
Neg06263	Negative	[M-H]-	Palmitic acid	255.231	5.64	0.271181	0.934705	0.702862	3914.78	36199.9	40264.4	6835.83	8525.47	19969.2	5260.89	23530.4	35669.9	43815.4	1982.93	2132.28	35356.2	2115.52	3148.62	31221	10524.3	44161.2	17429.2	17647.4	26512.7	27763.9	15279.9	19716.5	26417.2	19968	9704.67	20258.1	25817.2	14198.3	7165.05	26946.7	16825.4	9408.83	17774.3	10038.5	19534.6	27645.8	42573.9	19985.7	23284.4
Neg06571	Negative	[M-H]-	Abscisic acid	263.129	2.49	0.802642	3.51049	0.279031	217.868	150.181	189.421	388.123	363.029	452.44	166.37	58.5769	443.548	39847.4	1477.77	770.861	1712.03	2532	1679.13	403.976	285.921	426.36	343.575	944.239	107.578	43.6206	307.25	825.97	208.071	448.779	100.796	226.207	113.323	556.007	580.088	475.984	582.906	495.096	1018.85	954.79	923.586	959.159	1412.26	2086.04	3604.72
Neg06734	Negative	[M-H]-	Inosine	267.074	4.96	0.458935	0.466686	0.437741	42877.8	26494.8	18820.3	58915.9	14807	34411.1	120966	16526.9	809.317	894.145	561.167	947.116	1859.8	692.301	929.275	556.185	672.699	529.12	774.296	982.539	20328	98192.1	559436	20335.5	24976.4	15244.4	22334.3	7045.61	63886.2	36213.8	19724	17082.4	20468.1	24234.5	654.525	666.071	425.157	1379.62	411.501	679.884	659.18
Neg06807	Negative	[M-H]-	Aloe-emodin	269.044	5.01	0.537642	1.15571	0.409604	377.562	331.012	415.08	657.374	791.804	79.9311	623.513	352.489	270.123	410.917	689.492	604.736	813.793	179.281	878.57	216.347	314.318	351.545	175.293	219.488	174.277	381.4	387.96	331.711	94.221	130.849	187.462	415.216	1181.8	137.882	174.993	198.829	605.029	226.877	720.52	437.904	582.555	678.256	348.398	476.593	335.911
Neg07251	Negative	[M-H]-	9Z,12Z-Linoleic acid	279.233	1.35	0.406113	0.770123	0.536045	14721.5	16877	23516.3	14576.8	13440.7	24484.6	17444.9	15198.1	11042.4	12451.5	7756.53	8623.31	10320.7	8249.69	8926.11	10933.2	14019.9	10797.8	12393.7	20107.4	11862.7	10767.6	10699.6	159764	8705.63	7914.73	8944.46	11203.8	11482.3	11004.6	12972.7	19064.7	9591.98	13683.2	11899	8246.47	11514.5	11759.7	9797.81	11394.4	18034.4
Neg07323	Negative	[M-H]-	Oleic acid	281.25	1.36	1.19112	1.21005	0.108719	18826.8	20432.3	20852.8	18263.3	19434.9	27288.2	28960.4	3681.1	5668.37	16730.5	13986.4	11058.5	11101.8	5548.52	12616.9	13065.1	16052.7	11880.4	12102.3	29019.5	9571.24	15762.7	15475.3	22396.6	10761.8	15022.7	10877.5	10125	14394.2	18088.6	11538	18434.4	8953.28	13212.3	6666.39	16348.1	11387.9	14515.4	2865.4	16353.5	15998.2
Neg07324	Negative	[M-H]-	Trans-Vaccenic acid	281.25	0.96	0.194763	0.929757	0.797337	100653	306341	92357	39988.1	282264	263361	172607	51003	32719.5	12715.5	18590.8	7776.48	69260	6555.25	8247.44	48310.5	73398.6	33470.6	33166.5	222793	103307	131412	150110	385711	88966.3	30230.4	10199.2	94096.2	124102	62873.5	7924.97	293111	39366.4	106166	65779.8	39472	35760.2	100091	52961	108444	39166.1
Neg07406	Negative	[M-H]-	Stearic acid	283.263	1.61	0.568728	1.24798	0.479984	407553	778775	1.21519e+06	871783	733044	462916	258334	107098	10363.5	716163	83150.5	20576.2	19164.8	50389	51103.3	77501.1	67060.3	97883.5	188514	179987	179260	362421	188815	522087	606715	695976	47196	317738	540277	219911	93943.3	975010	240929	501227	50576.5	58373.8	61314	17037.3	126786	319811	29371.4
Neg07474	Negative	[M-H]-	isosakuranetin	285.076	0.91	1.04323	0.551143	0.207429	1364.24	1757.74	1981.51	1354.85	2070.98	939.567	1230.54	2496.2	6295.86	1224.71	1879.04	4940.2	4141.8	3409.1	3676.15	1569.95	3260.68	6307.97	1340.24	1708.76	1567.42	1012.22	1515.15	851.486	2344.73	633.698	3082.28	2518.44	758.725	1107.54	3329.71	3795.82	598.296	3172.24	5496.57	3894.63	4424.35	37852.6	937.653	3577.4	4170.89
Neg07639	Negative	[M-H]-	Epicatechin	289.07	1.27	0.744716	0.575439	0.250934	513.302	170.103	156.479	731.848	297.284	374.017	137.892	278.497	727.334	741.486	265.816	727.304	212.156	332.819	3159.34	1371.79	1534.38	1079.87	1984.32	682.032	543.27	1046.89	884.146	417.71	572.197	219.523	1094.62	733.917	316.225	600.774	116.984	874.846	695.447	621.138	971.843	4390.45	3461.86	993.827	175.088	1511.6	511.09
Neg07750	Negative	[M-H]-	FA 18:4+1O	291.197	0.68	0.244157	1.08116	0.752367	10148.5	19934.3	12613.8	12607.6	16229.1	13888.4	3185.01	24504.7	10172.2	278.918	6198.3	2973.03	8893.67	5557.71	2182.29	11003.1	6403.86	6576.59	4720.9	6740.78	7676.78	3609.32	7357.49	35771.9	8204.1	1395	2524.61	3875.69	7494.44	4971.83	2869.5	10409	8095.27	33774.4	8299.09	4778.34	2557.27	11725.9	7559	7883.61	7964.33
Neg08156	Negative	[M-H]-	FA 18:1+1O	297.243	1.1	0.597644	0.782594	0.496849	11764.9	16843.3	168.009	244.904	15475.9	10603.7	25441.1	129.486	48855.4	6233.76	59097.7	36887.9	85748	51909.7	40153.9	5706.4	5899.58	2977.31	5577.33	10117.1	6565.5	5694.16	118.314	11936.9	4692.4	35.686	48.9849	4262.75	121.957	511.239	6550.16	24054.7	14448.6	6514.89	68847.2	85292.2	72445.8	54388.5	85730	110188	59551
Neg08281	Negative	[M-H]-	Abietic acid	301.216	0.95	0.587847	2.06787	0.417731	8307.51	51461.7	18451.3	11085.1	452437	12294.3	14648	7422.82	9918.86	968.753	5174.76	2038.07	8047.16	1093.16	3941.38	3555.37	1581.38	3098.1	2116.54	8309.6	38337.7	7899.8	12806.4	15335.3	21686.5	30363.4	1154.91	17484.3	16334.7	3684.33	3680.66	7067.45	12567.1	8143.36	19784	5536.55	60131.7	47891.3	5385.95	8752.45	4815.62
Neg08985	Negative	[M-H]-	Uridine 5'-monophosphate	323.029	11.19	0.879674	0.189681	0.168467	104.942	174.701	512.261	2427.56	114.34	153.83	701.452	143.873	57.8084	153.807	96.753	182.332	207.934	479.002	551.91	173.269	47.98	246.983	60.1006	244.53	1126.34	4030.99	22853.9	1764.4	800.879	200.058	4029.95	546.919	1022.07	7622.93	349.986	162.678	343.395	80.6673	48.8182	56.1641	452.295	75.5593	200.862	108.815	138.157
Neg09217	Negative	[M-H]-	FA 18:1+3O	329.231	1.13	0.790213	1.28255	0.26344	17035.9	32799.3	19528.5	18237.5	24434.4	17447.6	53590.6	13480.9	20409.5	32529	29095.1	27401.5	21387.7	24779.4	21944.7	1248.3	1357.15	645.4	1109.86	2972.66	11773.4	13908.2	12414.7	143.647	12522.6	36.7674	14163.2	9420.28	11255.7	9923.96	13257.9	10008.9	11422.5	14036.1	41651.9	30886.7	28507.2	18097.8	27865.6	40074.3	25639.4
Neg09229	Negative	[M-H]-	Piroxicam	330.051	0.62	0.849674	3.09595	0.218744	1097.33	2520.9	2737.55	2523.52	1370.65	3562.21	161.873	2262.92	3720.76	779.364	2318	4976.66	1727.86	1049.02	497.304	71481.7	2280.52	1315.14	2816.71	3296.74	1159.69	142.046	1242.76	2319.14	3179.96	2031.94	2902.36	1456.78	1073.87	961.596	1073.16	812.185	301.072	1355.21	4131.46	872.299	552.704	3322.83	1125.18	999.581	1822.23
Neg09597	Negative	[M-H]-	D-(+)-Trehalose	341.107	10.23	0.889109	0.0941447	0.210348	2123.93	1679.58	4317.16	2844.33	2146.73	2299.9	1112.13	5593.58	2752.73	1921.44	1825.07	7391.55	1509.37	5979.71	6559.53	754.343	635.49	987.93	2885.83	67270.8	5297.15	4022.04	7152.04	1580.12	10435	1228.46	2323.02	6275.49	1258.43	2918.81	352.887	1535.2	50816.7	972163	5402.55	94497.9	4166.54	4129.1	468237	4396.47	3173.99
Neg09599	Negative	[M-H]-	Sucrose	341.107	9.31	0.0489523	0.979619	0.979052	13058.4	35691.1	80775.9	17856.5	9418.75	13754.2	11836.2	21343.6	17624.2	8724.51	9831.12	722180	28989.4	88129.1	103480	5028.64	3372.31	5274.97	2.85889e+06	16208.2	32595.1	14095	490016	15801.2	6316.74	6383.48	1.58459e+06	104114	7407.02	1.6111e+06	30966.1	19531	20790.3	119039	761854	13092.4	10177.5	187048	97484.9	11402	76213.8
Neg09751	Negative	[M-H]-	Gibberellic acid	345.134	4.81	0.311942	1.763	0.615043	271.48	620.648	284.956	233.447	310.147	84.4555	433.161	181.897	7029.5	18059.7	3244.79	7768.37	5051.64	193664	3311.46	53.6081	164.503	92.8438	44.0738	172.349	378.675	380.282	145.829	520.72	155.072	142.744	54.637	326.744	221.25	142.359	110.217	218.109	40.3994	100.834	3423.6	1483.96	13997.6	4129.1	5085.55	3119.37	136374
Neg09773	Negative	[M-H]-	Adenosine-3-monophosphate	346.055	10.86	0.786168	0.100828	0.221555	284.027	741.713	474.377	2096.72	187.232	449.424	1914	352.489	83.0338	214.641	357.477	11.1425	108.717	410.967	86.7844	122.533	136.106	88.3368	241.404	51.5575	1138.18	5726.6	68716.7	2976.89	1451.59	744	3891.48	3205.11	1164.53	14174.1	380.925	1241.17	68.2943	270.235	115.717	289.596	161.017	623.142	101.32	400.676	373.836
Neg09774	Negative	[M-H]-	AMP	346.057	10.99	0.817935	0.21083	0.21553	596.571	249.792	158.126	5260.43	50.0237	73.8986	229.321	394.623	4859.06	1353.27	1514.44	2364.24	1684.58	2638.65	8147.98	138.807	542.467	860.833	2627.4	212.122	1915.97	5778.05	113706	7444.12	3593.16	1473.94	5612.54	3673.61	950.835	20056.5	800.522	589.256	742.58	747.181	783.803	1229.47	749	424.021	28460.2	1847.33	3149.61
Neg09795	Negative	[M-H]-	Inosine-5'-monophosphate	347.04	11.35	0.854442	0.290396	0.176598	329.654	832.128	322.84	2045.16	94.3304	331.789	1154.1	338.102	309.012	72.3121	77.4024	113.451	88.6623	80.9063	305.208	456.627	229.129	266.813	223.374	304.926	228.066	673.323	10902.3	650.191	375.903	220.605	2946.63	722.858	12601.5	2337.73	106.349	482.009	414.575	951.874	122.045	433.517	224.338	332.461	143.092	64.9517	103.843
Neg09922	Negative	[M-H]-	trans-Zeatin riboside	350.146	2.82	1.11693	11.3892	0.0998312	426.611	707.998	349.194	91.66	360.171	455.456	648.993	118.181	1325.39	11241.7	110785	1244.93	1890.41	9026.57	44001.6	486.302	425.944	694.977	645.08	1371.43	284.007	335.543	254.054	326.041	264.997	369.837	288.257	382.039	556.902	461.996	191.429	189.188	329.929	144.193	1236.73	969.708	2304.89	1924.54	921.656	1195.28	363.903
Neg10037	Negative	[M-H]-	Caffeoyl quinic acid	353.085	5.18	0.678492	0.743807	0.286089	716.341	655.895	515.556	711.797	701.761	426.802	569.555	624.82	750.458	697.869	949.197	1108.18	696.632	714.366	2083.8	156.038	369.152	182.983	363.609	303.453	2202.13	656.545	1425.27	676.652	501.531	461.756	774.339	2803.97	3531.36	421.705	666.134	398.862	2429.74	488.037	656.333	966.198	686.583	299.571	355.508	503.586	232.97
Neg10170	Negative	[M-H]-	Sinigrin	358.022	2.33	1.0781	1.25618	0.100925	195.055	490.388	168.009	148.948	308.718	318.216	371.709	206.561	472.978	199.719	265.816	308.952	164.659	548.876	259.378	295.802	440.632	206.42	650.088	250.422	465.814	176.719	459.499	130.416	121.702	107.058	394.705	188.003	405.805	249.8	450.535	186.778	110.617	167.385	251.323	328.209	128.452	278.236	196.418	337.411	83.9777
Neg10487	Negative	[M-H]-	Dehydroisoandrosterone sulfate	367.157	0.62	0.539193	0.762576	0.358919	44311.6	53447.7	18200.9	92178.5	24798.9	60099.1	2135.83	25222	45788.4	32447.5	31760.4	21357.2	49249.8	17618.3	21227.1	16044.2	44612.5	33206.5	124708	47867.5	23438.1	31442.6	10601.5	208902	38362.7	167258	29452.2	18840.6	20609.7	57348.4	25374	22917.1	27017.6	45445.9	72759	53816.6	49645.7	23175.4	23386.2	10053.2	185238
Neg11067	Negative	[M-H]-	Sinapoylhexoside	385.113	2.72	0.615866	2.77458	0.286987	163.116	594.596	560.029	151.812	611.718	542.928	224.824	543.635	2883.06	482.081	28329.3	4606.93	6942.05	99065.2	2958.47	350.368	266.338	1191.65	678.135	727.698	1089.77	272.908	238.463	315.645	540.79	523.395	526.588	490.619	316.225	346.497	172.093	624.201	321.272	676.597	5925.99	4040.3	6071.6	22206.4	10076	4751.59	4142
Neg11770	Negative	[M-H]-	Cholic acid	407.279	5.18	0.667868	0.00868016	0.385215	42.2048	329.48	87.2986	30.0759	44.3067	257.891	17.9859	3245.37	137.689	14.9215	1911.63	929.895	102.384	40.4532	52.6557	4.78644	5.8751	69.4075	162.272	17.6769	59.168	645.361	312.753	36.8568	108.943	145.988	240.215	108.58	111.165	430.659	34.8053	45.7908	11.5427	40.3337	53.3384	58.7968	133.879	8659.99	699.463	1.11166e+06	52.3732
Neg12291	Negative	[M-H]-	Irbesartan	427.22	0.8	1.03566	1.74992	0.130138	12826.8	50.5713	3867.49	2559.32	3766.07	3058.5	2185.29	604.267	590.696	1430.17	120.177	115.477	1131.5	782.401	636.744	2181.66	1943.68	2498.67	9126.27	2010.74	835.883	73.8194	2616.67	601.049	36.3144	1011.1	1147.38	747.992	1079.27	4328.97	4593.33	5274.38	934.958	2111.47	406.818	477.395	69.6534	757.371	176.865	830.032	250.127
Neg12381	Negative	[M-H]-	Vitexin	431.099	4.79	0.174922	0.805775	0.771492	65.0182	737.115	1120.06	1288.97	940.445	85.9636	668.477	487.113	1395.81	55.095	72.3101	82.0496	30.6096	107.569	8741.82	245.066	292.776	97.3508	505.847	173.822	1382.38	737.076	13414.4	548.126	619.307	97.3256	627.384	4971.54	56.1219	517.507	102.482	326.561	73.1037	408.378	82.2677	377.353	721.862	736.037	166.2	123.155	495.739
Neg12539	Negative	[M-H]-	4-Methylsulfinylbutyl glucosinolate	436.039	6.82	0.6824	40.4545	0.26096	62.7369	27.5844	32.9429	52.991	85.7549	37.7033	58.4543	48.3002	51.502	29.8431	41.7565	69.8941	11.6105	42803.1	63.3818	17.2312	45.0424	18.0279	39.0654	44.1922	43.0313	31.3173	28.4321	44.4171	16.685	10.814	51.811	21.1127	8.63414	24.1742	11.6018	32.5356	46.1708	32.2669	27.1212	329.087	20.8056	256.902	92.4322	24.4623	39.7314
Neg12541	Negative	[M-H]-	(Methylsulfinyl)butyl glucosinolate	436.039	6.27	0.690358	9.30597	0.254572	279.464	30.6493	128.477	64.4485	240.114	96.5206	268.29	116.126	72.5232	49.3559	115.085	69.8941	45.3866	21488	98.4856	253.681	318.234	72.1117	189.317	157.619	393.736	140.928	176.095	85.9991	26.4997	105.977	90.4337	69.3703	145.701	58.1971	25.1372	173.523	73.1037	54.4504	106.677	225.534	63.3212	772.483	174.199	43.8635	110.164
Neg12785	Negative	[M-H]-	Indolylmethyl glucosinolate	447.054	1.12	0.681622	39.0882	0.26099	297.715	1685.71	92.24	148.948	115.769	158.354	61.452	5218.48	1985.45	2879.86	1022.53	3196.89	3053.57	1.14961e+06	1994.09	333.136	294.734	451.6	326.546	185.607	126.942	72.7009	960.271	113.405	553.549	771.035	804.483	145.778	1753.81	20.5928	41.573	86.7616	765.665	1020.44	2426.44	6431.67	2084.17	15439.9	1582.9	520.457	526.441
Neg12793	Negative	[M-H]-	Plantaginin	447.092	3.46	0.778884	8.67628	0.228317	169.96	554.752	281.661	246.336	367.317	214.155	205.339	73.9919	630.637	191.685	361.551	810.366	177.325	814.58	34037	262.297	268.296	466.022	248.416	304.926	105.427	144.283	234.794	211.69	136.424	112.465	493.617	62.3327	71.2317	104.755	231.068	328.971	626.191	134.109	386.025	229.922	202.628	296.015	63.1027	209.195	76.7538
Neg12879	Negative	[M-H]-	Glucoalyssin	450.054	6.11	1.19657	0.40684	0.0658332	122.052	219.142	260.249	67.3128	221.533	209.631	184.356	93.5175	8.40849	47.0603	29.5351	51.6608	16.8881	22.0654	4.87553	32.5478	24.4796	51.3796	116.194	4.41922	236.672	100.663	170.592	22.6811	327.811	224.93	338.184	1059.66	734.981	929.364	96.6813	561.54	492.488	132.093	12.6566	73.7154	34.3744	7.11147	14.2203	14.34	15.3508
Neg13494	Negative	[M-H]-	4-Methoxyglucobrassicin	477.063	2.82	0.732068	5.84159	0.227855	31.9388	58.2336	87.2986	120.304	112.911	81.4392	53.9578	95.5728	259.612	204.31	170.082	80.0237	180.491	15630.6	181.37	455.669	240.879	1103.31	500.838	294.614	96.8204	40.2651	136.657	57.6478	82.4434	85.4302	24.4925	92.4937	116.561	46.5577	58.9756	40.9708	690.638	214.777	177.192	358.046	136.593	248.012	111.985	210.882	131.836
Neg13518	Negative	[M-H]-	Glucoibarin	478.087	5.3	1.12365	1.44079	0.0867209	54.7522	119.532	65.8857	91.66	38.5897	79.9311	169.368	46.2449	67.2679	28.6953	48.8857	195.501	52.7752	330.981	102.386	32.5478	94.9807	197.406	128.215	33.8807	79.6079	106.255	105.474	50.0874	37.2958	34.6046	56.5211	53.2844	44.25	142.359	48.3407	34.9456	124.084	42.3503	174.48	73.7154	65.1304	101.338	87.0996	23.6188	117.388
Neg13734	Negative	[M+FA-H]-	Cinobufagin	487.236	6.23	0.289081	1.11572	0.694814	92.3943	283.506	536.969	83.0669	34.302	12.0651	149.883	102.766	88.2891	109.042	116.104	100.283	24.2766	98.3748	124.813	123.49	20.5628	81.1257	49.0821	57.4498	192.565	142.046	138.492	94.5045	113.85	27.0349	58.4051	128.687	22.6646	116.394	56.0752	125.322	128.893	93.7757	129.278	39.4904	48.8478	32.0016	71.9905	475.75	107.455
Neg13831	Negative	[M-H]-	Glucohirsutin	492.103	4.71	0.0733944	0.916592	0.7596	34.2201	219.142	130.124	173.295	37.1605	107.078	14.9883	535.413	2.10212	57.3906	4.07381	115.477	4.22201	94.6972	39.0042	127.319	143.94	175.772	123.206	116.373	84.9868	185.667	425.564	441.336	38.2773	109.221	120.578	220.175	63.6768	141.464	135.354	59.0461	23.0854	211.752	115.717	69.3276	99.5048	42.6688	31.107	34.5846	27.0896
Neg15146	Negative	[M-H]-	Uridine-5'-diphosphogalactose disodium salt	565.046	11.44	0.609001	0.0385583	0.342513	25.0948	6.12986	19.7657	181.888	7.14624	16.5895	218.829	33.9129	95.6466	97.564	91.6607	77.9978	42.2201	93.7778	97.5105	55.5227	37.2089	35.1545	15.0251	16.2038	128.018	347.846	37554.2	553.797	20.6109	234.663	536.95	185.993	1190.43	623.157	361.588	194.009	131.779	69.5756	38.8737	98.2872	43.4203	6.22253	26.6631	37.9588	18.0597
Neg15554	Negative	[M-H]-	Tiliroside	593.128	3.25	0.0967354	1.32177	0.812543	78.7063	61.2986	57.65	166.134	74.3209	13.5732	35.9719	30.8299	31.5318	71.1643	261.742	103.322	30.6096	118.601	428.071	273.784	98.8975	34341.4	370.62	163.511	116.185	85.0042	46.7754	17.9559	105.999	37.8488	83.8396	31.1663	31.2988	117.29	36.7389	10.8452	185.645	15.1251	79.5556	164.982	9.95048	65.7811	53.3263	119.781	38.8284
Neg15559	Negative	[M-H]-	Apigenin-6-C-glucoside-7-O-glucoside	593.149	8.94	0.729024	0.105399	0.260496	103.801	73.5583	115.3	14.3219	111.481	164.387	202.342	29.8023	21.0212	18.365	48.8857	64.8293	69.6632	76.3094	104.336	67.9675	97.9183	80.2243	80.1341	38.2999	346.402	126.388	13575.9	167.273	115.813	67.0465	1358.39	477.549	337.811	251.591	62.8429	122.912	346.281	82.684	321.838	139.533	75.9855	271.125	98.6536	84.3528	183.306
Neg15560	Negative	[M-H]-	Kaempferol-3-O-glucoside-7-O-rhamnoside	593.152	5.06	0.65556	14.893	0.280773	33.0795	96.5452	77.4157	121.736	145.783	16.5895	82.4356	128.458	60.9616	60.834	43.7934	89.1403	73.8852	61238.7	144.316	41.1634	48.9591	37.8586	46.0771	83.9651	76.3806	216.984	51.3612	34.9667	101.091	83.2674	35.7967	126.676	41.0122	85.9527	35.7721	65.0712	85.6083	40.3337	116.621	3332.99	62.4167	289.792	162.645	154.366	44.2463
Neg15684	Negative	[M-H]-	Uridine 5'-diphospho-N-acetylgalactosamine	606.072	11.19	0.665486	0.278206	0.300979	225.853	29.1168	70.8272	6767.09	100.047	45.244	3059.11	40.0789	6596.46	390.256	646.717	1601.49	695.577	879.857	2963.35	196.244	98.8975	2025.44	546.915	185.607	2416.21	4896.69	76514.4	7374.19	293.459	316.849	3723.8	1607.58	1591.92	13222.4	540.449	50.6109	81.7607	190.577	519.823	227.289	109.455	115.561	5219.75	528.892	2426.32
Neg15685	Negative	[M-H]-	Uridine 5'-diphospho-N-acetylglucosamine	606.075	11.09	0.817012	0.119957	0.202697	61.5962	21.4545	70.8272	8650.42	91.4719	535.388	1274	138.735	58.8594	11.4781	140.546	119.529	47.4977	9.1939	133.589	16.2739	101.835	41.4642	45.0754	2.94614	2586.18	7251.08	72193.6	6049.24	465.216	148.151	3829.3	2255.04	4657.04	23313.8	410.896	103.632	178.912	84.7007	11.7525	10.5308	57.8937	36.4463	30.2182	44.707	55.9851
Neg15740	Negative	[M-H]-	Hesperetin-7-O-rutinoside	609.184	1.2	0.507025	0.1562	0.436998	290.871	910.284	597.913	406.741	483.086	75.4067	6134.7	92.4898	1253.92	1921.44	915.589	24.311	51.7197	25.7429	7.80084	49.779	48.9591	162.251	53.0888	35.3537	65.6227	304.225	261.392	209.8	102.073	61.6395	106101	1279.83	223.408	2538.29	61.8761	19.2804	252.977	606.013	63.2828	8.77564	31.6606	17.7787	15.1091	113.033	21.6717
Neg15769	Negative	[M-H]-	Oxidized glutathione	611.144	12.11	0.673553	0.495924	0.296303	952.46	315.688	146.596	2593.69	108.623	915.437	1975.46	614.544	3351.83	2364.49	1212.98	2633.69	1734.19	12156.2	4144.2	1727.91	2111.12	4150.93	2461.12	908.885	966.053	13576.1	48728.9	3943.67	2083.66	1642.64	9304.31	1748.33	4613.87	14543.9	2035.14	1127.9	1116.76	1149.51	922.121	1419.9	1466.34	1033.83	1210.51	873.051	2848.92
Neg17190	Negative	[M-H]-	Robinin	739.207	6.6	0.6613	17.2374	0.276526	22.8134	4.59739	16.4714	7.16094	8.57549	16.5895	7.49414	43.1619	7.35743	12.6259	19.3506	10.1296	5.27752	12741.8	4.87553	8.61559	8.81264	5.40838	8.01341	4.41922	20.4399	5.59238	22.0119	22.6811	22.5738	5.40698	7.53614	12.0644	38.8536	0	15.469	8.43515	7.69513	15.1251	18.0808	501.967	26.2331	76.4483	13.3316	5.06117	22.5746
Neg17307	Negative	[M-H]-	alpha-Hederin	749.431	0.71	0.0223149	0.982969	0.968244	4116.68	2537.76	87.2986	1154.34	1280.61	613.811	3135.55	536.441	571.777	0	728.193	179.294	531.974	125.956	462.2	1518.26	1591.17	869.847	1052.76	1104.8	1295.24	1880.16	1593.11	5493.55	891.174	348.209	0	309.653	802.975	919.515	455.369	2436.55	0	766.339	271.212	1409.37	423.348	1225.84	745.679	1985.66	914.724
Neg17350	Negative	[M-2H]-	Cyanidin 3-(2G-glucosylrutinoside)	755.208	12.13	0.539608	0.475891	0.412636	159.694	62.831	56.0029	236.311	5.71699	61.8335	17.9859	86.3238	218.621	123.964	67.2178	40.5183	706.132	2371.11	20.4772	79.4549	69.522	416.445	58.0972	32.4076	46.2586	3433.72	6421.06	270.283	116.795	50.8256	336.3	150.805	715.555	57.3018	117.951	30.1256	97.151	49.4087	120.237	82.491	21.7101	162.675	657.691	65.7952	100.231
Neg18157	Negative	[M-H]-	alpha-Chaconine	850.49	6.77	0.652456	0.195052	0.380592	6.84403	13.7922	0	4.29656	4.28775	4.5244	4.49648	0	0	0	6.11071	18.2332	0	3.67756	0	0	3.91673	3.60559	0	5.89229	13.9852	0	5.50298	10.3955	4.90735	8.65116	0	0	0	3.58136	12.5686	0	5.77135	3.02502	506.263	3.51026	6.33212	3.55573	0	5.06117	8.12687
Pos00084	Positive	[M+H]+	Trimethylamine??N-oxide	76.0763	8.35	0.9899	0.704004	0.211747	86.0899	156.438	178.063	80246.3	174.947	233507	435.783	17476.1	458811	426316	447362	585543	334882	359258	330564	59111.6	35491.9	31917.9	108349	155490	76753.8	68460.2	99853.3	158621	42516	107901	13790.7	20844.5	118613	376704	176561	808126	107286	206608	440866	615689	540646	390290	571530	379193	382609
Pos00169	Positive	[M+H]+	Lactamide	90.0554	8.65	1.32478	2.03508	0.0616762	80.8191	273.767	686.114	1723.99	493.032	118.488	102.756	119.922	16.4435	2098.68	120.149	497.206	705.51	197.083	1041.89	49.9229	79.3049	0	62.4005	521.615	125.878	294.2	67.3977	482.58	155.657	92.03	59.3595	204.722	129.122	148.323	356.528	462.66	0	265.452	96.0656	467.852	93.1231	385.738	70.3611	242.265	503.113
Pos00211	Positive	[M+H]+	1-Hexylamine	102.127	4.98	0.418471	0.800584	0.586234	716.83	2937.73	993.232	1117.35	2971.2	536.602	744.05	391.411	10604	29937.4	2158.95	3271.74	4192.07	36150.4	25800.9	4547.79	4437.21	3999.26	4079.31	15068.3	2978.82	6352	229.299	347.648	827.843	402.912	162.345	861.349	477.06	5041.24	864.194	4749.82	403.911	7345.92	5027.43	33329.6	38690.3	5046.17	26589.4	31961.6	28757.5
Pos00227	Positive	[M]+	Choline	104.106	5.71	0.874486	3.61365	0.206155	9434.75	29932.3	1024.27	812.202	30822.5	497.106	2217.29	189.876	3091.37	2996.12	365926	3860.25	3078.79	1914.4	2237.67	14929.8	20699.6	16630.4	18877.5	32371.9	173.412	19287.1	272.521	634.974	209.025	243.543	594.31	573.98	249.372	693.908	213.917	23188.8	123.244	803.672	3775.38	14357	12405.1	4252	2685.78	2693.87	10319.7
Pos00257	Positive	[M+H]+	Uracil	113.035	3.52	0.267952	1.09278	0.840847	22970.2	8596.58	38049.9	6476.6	34211.5	10902.3	30629.8	11294.3	113.049	31.7681	93.1387	37.5974	45.308	25.267	72.3185	49.9229	145.07	12.4008	25.1465	150.466	9452.28	32159.1	22829.5	39089	4247.22	1828.26	12895.3	11017.8	15880	9797.97	8528.01	92.9969	11128.3	15401.4	14.9435	52.8071	85.598	60.1791	20.1032	112.928	55.8015
Pos00261	Positive	[M+H]+	Creatinine	114.066	4.01	0.772888	0.865392	0.374078	49384.8	152694	180244	90434.9	83663.6	79877.4	121959	47533.2	334492	204356	254895	264816	146512	164205	206510	292242	125703	212202	235946	278654	66323.6	67692.2	101247	123963	82023.8	133932	105674	160675	154308	152729	124252	233456	254488	112189	466236	442724	117057	387980	154177	252162	200632
Pos00299	Positive	[M+H]+	Betaine	118.086	6.75	0.172735	0.963676	0.77154	1.1964e+06	2.68485e+06	2.56334e+06	1.3625e+06	2.53976e+06	1.85022e+06	2.1101e+06	1.23364e+06	1.33427e+06	1.48574e+06	279288	1.26628e+06	1.78307e+06	335139	1.23122e+06	1.14301e+06	929468	250120	1.57445e+06	1.732e+06	1.46751e+06	694732	1.38018e+06	1.49031e+06	1.14323e+06	1.76541e+06	1.44444e+06	1.69346e+06	2.06337e+06	1.60873e+06	1.40217e+06	1.24015e+06	818431	637869	1.44401e+06	2.19852e+06	1.49032e+06	1.04975e+06	963329	1.19806e+06	1.10505e+06
Pos00312	Positive	[M+H]+	Valine	118.086	7.41	0.345094	0.852618	0.734374	14950.6	116018	195770	5482.59	151484	171443	174479	5891.99	16851.5	15769.9	13325.4	18054.4	25556.9	42343.3	20601.5	50869.5	234943	57523.8	63912	747034	8765.68	17172.3	8658.4	11043	6903.56	177040	7770.37	8699.93	7333.31	30591.8	25942.9	577825	10640.5	186805	33541.8	37032.6	36493.9	39995.4	24723.9	29090.1	23842.5
Pos00349	Positive	[M+H]+	L-beta-Homoserine	120.064	1.99	0.981626	0.687272	0.138415	2040.68	3002.41	2407.93	1265.35	2362.51	3490.63	2448.8	3478.56	1115.07	675.071	11560.4	8055.05	1285.88	4627.23	963.686	1136.71	2472.96	2366.78	458.224	860.999	5809.75	3225.52	2433.64	6779.93	2180.47	3146.98	1822.27	4673.73	4708.5	3571.02	921.549	5089.26	4588.01	5722.9	658.583	7506.94	4352.33	1281.52	8820.26	9125.96	12132.3
Pos00375	Positive	[M+H]+	Nicotinamide	123.054	1.72	0.0245483	1.07029	0.781349	4498.64	8112.22	3210.03	2743.58	14146.1	9905.34	7553.16	1145.92	14503.1	22822.4	12948.1	11582.3	9949.42	18941.8	8904.42	10217.9	8945.98	6529.91	10491.7	13083.8	1928.66	4359.6	7994.68	1238.99	630.253	2638.57	1070.62	3015.48	2262.09	8590.58	875.045	9689.12	3667.3	5733.35	19171.5	9091.15	11647.9	47154.8	10060.6	13706.8	15826.9
Pos00394	Positive	[M+H]+	Taurine	126.022	7.29	0.703665	0.81696	0.331182	2117.99	23456.7	26598.4	1104.56	28008.8	48501.2	63066	8024.77	4522.98	2702.27	2274.45	10765.1	6247.11	33835.1	9993.41	61728.7	35184.3	72258.7	83369.8	27398.1	20622.8	20856.2	20217.8	9619.86	26196.8	18688.8	29493.8	29379.9	18959.2	34187.1	35220.4	22081	19242.7	30555.2	33727.5	54972.2	71378.4	31399.7	22023	43402.1	18486.5
Pos00400	Positive	[M+H]+	THYMINE	127.051	2.17	0.362078	0.963407	0.856487	311.856	324.91	592.999	190.032	430.861	407.218	303.315	399.739	826.284	561.897	456.38	497.973	956.862	703.265	470.07	340.82	877.19	303.82	163.918	222.355	155.807	175.743	349.442	90.4838	100.383	399.545	148.041	124.35	400.178	173.477	203.841	225.518	1218.98	260.227	835.77	510.468	300.063	1233.18	414.125	129.337	440.111
Pos00458	Positive	[M+H-H2O]+	Indole-3-carbinol	130.064	1.03	0.00265017	1.0349	0.894719	10240.3	23031	42726.9	6041.72	20554.1	7644.53	27428.3	1812.98	55175	42682.4	27538.3	33510	67739.8	37899.7	30881.7	7277.23	7884.07	5078.13	5876.82	29498	11530.6	15914	9380.73	6374.34	7394.04	7885.4	4425.5	969.776	9468.25	7320.72	5830.02	15922.2	34999.4	7356.37	54761.6	63298.1	52252.4	44824.6	73084	65952.1	38318.5
Pos00464	Positive	[M+H]+	N-Methylproline	130.086	6.7	0.37425	0.879643	0.554119	20377.8	44927.8	16592.5	40580.9	6110.13	23373.5	8934.79	64253.9	23727.9	20344.5	39599.8	43200.1	32063	50721	17459	35282.1	40391.4	49400.4	11141.7	4229.76	36979	25810.9	90518.7	37961.1	129343	22331.9	18831.3	26362.1	18124.3	13611.9	24801.2	19888.6	10610.4	26032.1	28069.3	8422.26	7893.83	58875.9	19807.6	26283.3	43273.1
Pos00470	Positive	[M+H]+	Metformin	130.108	6.5	0.295631	1.18958	0.795825	45148.9	1483.15	14137.2	50339.2	8012.85	746791	8583.19	566269	17296.5	9479.78	27567.2	22996.5	7132.77	8142.72	16606.3	21232.6	14748.8	13947.4	14336.3	23449.3	55895.1	5568.44	11221.7	475984	10520.5	37827.7	15921.2	35454.8	29423.9	21358.5	5615.32	38357.7	16861.7	55868.3	33421.2	19387.6	17141.2	102769	36849.1	19389.9	600962
Pos00508	Positive	[M+H]+	Isoleucine	132.102	6.75	1.08965	1.22965	0.0975065	249401	187201	253882	137803	271682	166303	216642	175904	299526	234052	176511	301393	366834	259662	244452	93218.6	134197	143716	103121	366329	140128	107664	130201	161427	106869	127847	66166.5	50567.1	161379	404688	105407	106604	227923	137555	293736	229545	250874	270707	225115	270429	237290
Pos00511	Positive	[M+H]+	Leucine	132.102	6.32	0.442552	1.16555	0.650432	148686	620127	415534	295463	784279	408960	357557	179570	39424.2	43407.1	47691.7	62656.4	65566.1	40259.6	55846.7	20366.6	27358.3	37795.9	22356.1	78372.6	138281	223944	257069	275999	211839	239790	62078.6	110457	324935	82369.4	137680	378972	107672	347855	39062.4	34788.7	51372.9	70503.3	47287.7	42233.3	822828
Pos00518	Positive	[M+H]+	Asparagine	133.06	9.5	0.905624	0.787179	0.186813	12491.8	16000.3	16992.8	5901.94	28130.3	4920.66	9465.9	10565.6	6219.74	5950.55	8571.55	18458	11030.3	4831.05	14987.6	2616.15	4800.85	10121.7	3801.77	5931.69	18084.2	21033.8	10231.3	7649.85	9786.71	5662.09	8589.25	5661.7	21550.5	13779.3	16326.7	3457.16	21972.7	12553.6	13410.8	7214.19	18175	27602.5	25770.2	13156.6	12412.2
Pos00568	Positive	[M+H]+	Hypoxanthine	137.047	5.25	0.432222	1.20905	0.390987	18330.1	22415.8	8808.4	4398.13	30323.6	4597.89	19189.3	7077.88	18601.7	11276.7	11902.2	13943.3	19670.1	39152.1	9931.18	4521.86	15373.6	11285.6	9442.03	7947.94	3426.87	3556.62	11084	7179.17	3630.31	12555.4	2322.89	3603.87	1993.01	3517.24	3155.28	10487.7	2797.34	13992.7	34236.7	20053.7	17684	33907.5	20380.6	36728.7	14621.8
Pos00571	Positive	[M]+	1-Methylnicotinamide	137.071	7.32	1.03233	1.96572	0.159185	125.621	18479.3	42143.7	174.5	13110.9	15852.9	18732.5	300.637	497.415	327.608	257.063	269.32	474.655	67.3787	298.524	400.343	146.037	23334.8	472.194	2343.92	4935.64	6778.25	7956.59	350.823	3972.12	1218.84	3389.93	6089.34	11357.8	4805.31	4434.9	8234.88	9360.37	7593.6	319.151	371.502	296.301	916.498	817.193	484.53	401.41
Pos00580	Positive	[M+H]+	Trigonelline	138.055	7.07	1.33968	0.45786	0.0506798	9830.94	12958.8	59922.3	25984.1	18957.9	39083.4	14539.3	61564	29647.6	13302.9	24847.5	22421.8	29314.3	4819.26	12832.3	678.76	667.322	17497.5	7619.37	17569.4	27367.4	69073.9	174967	49290.6	1883.77	48953.2	21336.5	55757.2	85914.1	5017.82	8590.79	22064.7	202652	34303.9	9331.17	635.538	4222.52	30171.4	36616.9	12345.9	17115.7
Pos00598	Positive	[M+H]+	Urocanic acid	139.051	7.17	0.339091	0.927373	0.78699	1008.48	1774.97	1323.22	1189.52	3681.11	928.838	5637.94	3402.78	2201.37	853.766	500.155	3365.35	2409.95	838.865	6290.03	596.195	575.444	891.973	331.561	1870.79	1382.9	1767.14	1372.13	2334.32	385.013	544.324	419.808	789.317	1464.69	249.807	429.384	3322.31	2089.98	1446.4	4534.29	1710.21	1681.86	9856.55	4446.82	3260.44	2165.46
Pos00669	Positive	[M+H]+	Indole-3-carboxyaldehyde	146.06	6.19	0.394616	1.08915	0.741735	14266.3	12814.4	20534.4	18596.6	6981.97	17912.1	18458.9	17719.3	2148.96	3847.91	2206.46	3765.11	4441.26	2972.24	2638.78	962.936	981.64	972.578	664.053	2021.26	9723.4	11896.2	13734.5	11462.9	11842.7	7571.15	5286.57	10177	14102.8	11730.5	12001.1	3618.74	18110.7	17856.4	2986.57	2522.7	2802.16	2976.4	3243.65	3108.91	2503.87
Pos00674	Positive	[M+H]+	4-Acetamidobutyric acid	146.081	6.09	0.369947	0.72333	0.500795	617.563	1159.75	8641.77	2778.3	523.395	6563.15	766.334	5898.65	350.451	165.79	54.0204	164.968	77.6708	144.022	78.2049	262.095	453.586	410.113	143.428	707.189	1203.32	897.164	2542.8	4949.62	3048.34	1272.71	4725.87	4713.91	4950.97	804.933	776.612	1022.97	13008	7827.7	64.0437	150.083	106.292	61.1657	184.949	58.8772	78.302
Pos00678	Positive	[M+H]+	L-beta-Homoleucine	146.116	6.71	0.0563848	1.02471	0.934464	412.88	904.032	1981.56	273.17	1630.91	393.599	607.868	1482.37	8733.54	4890.29	5961.81	6993.88	9023.84	10833.7	7628.76	3981.35	3777.62	7542.35	1831.03	718.892	286.966	6321.9	302.557	4170.99	151.21	5510.58	3352.74	725.626	1048.74	2844.15	338.702	241.792	8250.13	3891.9	1368.4	1424.86	7596.59	14551.5	6354.61	5682.13	15800.8
Pos00681	Positive	[M]+	Acetylcholine	146.117	9.57	0.807545	0.756911	0.302642	214616	400037	251872	96304.9	218000	179266	375571	148744	113212	201499	231774	192631	149921	185299	135680	131093	87880.5	104780	125938	145209	150504	112542	295101	165356	143867	191058	287826	258186	182269	133853	198683	1.37691e+06	383764	312586	304937	130567	144001	242465	147425	170479	211708
Pos00689	Positive	[M+H-H2O]+	Coumaric acid	147.044	7.28	0.101824	0.989635	0.770457	3679.02	18876.4	15551.9	246.676	8810.96	10481.4	15639.9	4503.73	66.8016	25.8115	0	0	128.373	12.6335	5.04548	60.4835	103.483	47.8317	57.7437	76.9047	7544.75	6637.46	7547.07	5848.11	6700.89	2182.91	6610.36	5961.2	10033	9258.46	8827.18	7179.36	13386	16291.9	8.53916	4.6322	31.041	24.6636	46.2373	10.6172	17.1004
Pos00699	Positive	[M+H]+	L-Glutamine	147.076	10.24	0.123189	1.05577	0.767322	26304.8	21072.5	18570.8	19954.2	31983.5	27485.2	30524.6	14949.4	20751.7	13731.7	20688	13910.3	24685.3	2385.21	2484.06	8790.27	10775.8	6372.25	6244.7	54032.3	10569.3	20452.2	13194.6	15898.2	9861.68	7399.44	2202.74	10638	16101.7	13065.4	8989.17	30575.1	28370.1	12874.4	34127.8	4365.38	7119.68	23462.9	36583.7	25967.7	27698.2
Pos00701	Positive	[M+H]+	Glutamine	147.076	9.43	1.33275	1.20357	0.0576824	944401	1.43245e+06	1.20906e+06	671898	1.57278e+06	940010	1.33726e+06	583890	1.01697e+06	901936	667568	692651	982533	694516	634182	580181	460370	534486	447421	724043	640845	798177	536230	740699	540915	618368	487274	543617	849550	889052	613695	393550	807676	623849	893957	887270	949967	800686	934282	851044	884649
Pos00704	Positive	[M+H]+	Lysine	147.112	12.43	0.636109	0.850069	0.382079	5650.31	3972.63	12415.4	5622.37	3540.87	10717.1	8005.03	7437.65	7160.1	11263.8	12524.4	15076.5	20878.4	22625.8	18503.4	4976.93	4852.11	3613.95	6042.6	4121.09	3996.4	6134.51	7103.86	6144.17	2935.89	6264.78	13729.9	8842.47	16683.3	13800.1	12653.7	5257.81	14424.8	6293.51	18530	22793.2	21122	13771.2	11854.8	9556.44	22113.6
Pos00711	Positive	[M+H]+	Glutamic acid	148.06	10.17	0.838379	1.16896	0.208531	5627.47	6061.98	9574.56	5593.14	5715.41	7876.06	9676.36	9054.09	15649	9808.39	13033.8	14616.2	13591.3	12800.3	10319.7	5132.46	3547.45	6263.3	4156.62	10221.6	3860.84	4032.38	7207.89	9665.1	7781.59	8105.38	4326.81	6372.92	4779.47	5563.4	3140.55	6191.27	11617.1	9747.53	8446.3	11899.2	14987.2	13431.8	6892.37	9402.97	10726.5
Pos00736	Positive	[M+H]+	Phthalic anhydride	149.024	0.8	0.451197	0.936116	0.521141	770571	1.47883e+06	1.19653e+06	746134	1.82934e+06	1.43314e+06	1.59683e+06	597942	712523	392780	559245	519058	799539	764412	734374	640550	615224	542253	618993	1.24394e+06	1.04037e+06	982869	943820	606152	666453	620652	844381	803858	997399	1.09972e+06	1.10352e+06	1.34228e+06	1.27405e+06	1.38809e+06	944003	1.13663e+06	774404	698062	939490	973738	989015
Pos00739	Positive	[M+H]+	p-Coumaraldehyde	149.058	6.24	0.660972	1.12901	0.3479	42658.4	89684.2	60129.7	44882.2	31104.4	22732	55606.9	38695.6	40483.8	58574.3	38306.1	38072.3	59998.6	46140.1	36123.1	16480.3	18669.5	15728.7	16678.6	26286.4	32972.1	29004.4	20694	35990.3	33277	23980.6	36200.7	25355.2	56239.8	46257.6	50180.6	29727.6	66129.5	34355.1	43662.9	42430	33446.2	60865.7	47666.6	39797.1	31400
Pos00744	Positive	[M+H]+	Methionine	150.058	6.96	1.20591	1.37079	0.101636	102032	88593.7	98070.2	93641.7	79558.9	11039.8	158787	81954	6995.67	105411	94643.8	110427	139134	114419	59005.2	32994.3	36278.1	32530.9	28368	41516.8	73117.4	47225.4	71361.7	56002.3	49794.4	56635.5	29875	24328.6	47179.6	44759.6	102573	31029.6	101401	37461.1	5304.95	108440	126067	1843.85	113553	112215	74227.6
Pos00757	Positive	[M+H]+	Methamphetamine	150.127	4.37	0.0769696	1.03168	0.920318	166.909	159.447	153.559	69.4346	322.423	192.033	342.931	54.9641	44991.4	43191.6	53547.3	36405	48276.7	39817.5	35346.9	21475.5	23441.4	21596	22902.8	42968	92.4278	331.096	104.027	132.551	40.0262	139.167	113.713	115.251	89.6951	87.6058	51.1541	5592.6	221.633	118.095	61298.4	48022	50189.6	55945.9	55985.3	50328.4	49648
Pos00781	Positive	[M+H]+	Acetominophen	152.071	1.07	0.914283	1.58465	0.151224	800.284	1615.53	1333.02	678.815	1435.72	1521.28	817.093	162.394	8568.07	1467.29	428.438	1171.66	2817.73	142.338	2193.94	905.333	699.237	718.361	2039.66	2265.35	131.159	339.835	769.213	380.191	360.871	181.815	338.278	486.783	390.321	191.692	206.942	969.493	1083.31	969.841	3448.75	1272	2681.76	2342.05	1179.05	1047.24	892.823
Pos00784	Positive	[M+H]+	Symmetrel	152.143	4.97	0.698552	0.0409322	0.393579	10.5416	43.6222	91.4819	14.6178	37.5919	29.9625	47.0447	14.9902	11.3049	7.94201	14.9022	13.8113	17.2602	3.36894	21.0228	23.0413	3.86853	39.8598	68.9199	78.5766	7.04212	14.5644	10.2562	34.9236	5.71802	10.1009	2.14552	5.30761	12.8136	21.6846	6.97556	18379.7	3.107	32.3977	22.4153	7.41152	8.46573	15.7847	8.04126	11.5824	8.10021
Pos00785	Positive	[M+H]+	Amantadine	152.143	5.28	0.707077	0.00156844	0.386765	15.8124	33.0927	32.6721	2.74084	20.2418	16.3432	18.5703	6.66232	8.22173	28.7898	16.765	21.4842	48.5443	10.1068	7.56821	16.321	3.86853	10.6293	5.5881	31.765	1.76053	6.7967	6.59325	3.96859	10.1654	8.97854	7.86692	2.27469	12.8136	9.54123	5.42543	294639	3.107	8.3607	3.20219	5.55864	23.5159	35.5155	8.04126	19.304	2.70007
Pos00839	Positive	[M+H]+	Histidine	156.075	10	0.856145	0.758655	0.190961	17541.3	46117.7	29801.9	27670.6	24288.7	16858	8780.03	42617.2	6877.48	10162.8	25123.2	42382.2	43224.9	21770.9	42130.6	16011.8	31104	9675.29	8645.72	12762.8	7591.4	16042.2	11555	68512.1	28495.4	8379.22	63828.6	8828.83	29352	96870.4	44924.9	31413.2	13361.2	14521.5	23020.5	66118.2	30991.2	15152.3	25638.6	8358.63	53194.1
Pos00970	Positive	[M+H]+	2,8-Quinolinediol	162.054	0.68	0.910729	2.44919	0.193142	147.583	132.371	4216.33	114.202	300.735	118.488	82.9473	92.4397	123.326	50.6303	194.66	102.817	204.965	247.617	89.1367	108.486	75.4364	3657.35	40.0481	426.32	134.681	75.7346	89.3752	128.582	138.503	188.549	218.128	112.976	1311.91	78.932	103.083	196.456	363.519	322.932	298.871	60.2186	190.949	191.389	204.047	108.102	127.803
Pos01017	Positive	[M+H]+	(-)-Nicotine	163.123	2.03	1.08347	2.89266	0.105856	13806	12342.1	17102.2	4019.9	14697	7391.21	9897.97	13220.5	829221	4.8458e+06	365963	658996	910513	4.0182e+06	1.12551e+06	258695	190567	354919	250397	2746.84	4775.44	9864.92	10757.3	12221.7	3317.72	9467.87	3388.5	10161.8	3926.87	212384	18976.6	15729.3	25073.5	63351.1	1.53959e+06	1.10864e+06	987484	113995	282176	72586.9	731238
Pos01042	Positive	[M+H]+	Methioninesulfoxide	166.052	9.27	0.158034	1.09002	0.74293	37491.3	122092	103249	37579.6	73645.4	78900.9	14310.3	25069.5	151339	29806.4	34410.1	19721	67723.6	17849.5	72506	6048.35	7610.37	5220.74	14016.8	8678.53	20399.3	30324	39929.5	43207.6	47356.7	19849.3	18194	29085.7	70252	21708.9	11885.6	20453.5	48536.6	39250.3	147782	26164.5	26633.2	165649	32122.8	27121.1	34010.1
Pos01049	Positive	[M+H]+	Phenylalanine	166.086	6.24	1.16706	1.2655	0.0988904	2.52215e+06	5.26541e+06	3.0918e+06	2.23521e+06	2.61174e+06	1.40031e+06	5.30232e+06	1.85866e+06	2.62922e+06	2.7924e+06	2.16017e+06	2.11196e+06	2.97174e+06	2.17532e+06	1.62794e+06	776864	955726	669075	790160	1.2856e+06	2.25571e+06	1.86064e+06	2.60574e+06	1.7393e+06	1.649e+06	1.28552e+06	1.68026e+06	1.29496e+06	2.75973e+06	2.15157e+06	2.2365e+06	1.46719e+06	2.17202e+06	1.73246e+06	2.48737e+06	1.98247e+06	1.50503e+06	2.91647e+06	1.7896e+06	1.51912e+06	1.45277e+06
Pos01053	Positive	[M+H]+	Ephedrine	166.123	4.42	0.178064	0.995236	0.985232	56.222	22.5632	32.6721	16.445	8.67505	34.0483	19.8083	12.4919	58.5798	121.116	8.38248	36.8301	33.4416	161.709	37.8411	21.1212	38.6853	7.97195	50.2929	31.765	13.204	33.9835	12.4539	45.2419	12.7067	71.8283	9.29727	22.7469	2.95698	11.276	32.5526	129.033	113.923	28.2173	51.235	6.48508	52.6757	69.058	24.1238	18.3388	63.9017
Pos01094	Positive	[M+H]+	Norharman	169.075	1.06	0.51796	0.70528	0.553859	1787.68	3118.23	4129.75	978.48	3043.5	2535.92	3762.34	666.232	252315	29029	18819.6	33793.1	185167	69768.1	53798.2	2003.64	2922.68	1800.78	1184.68	2972.53	1440.99	306.822	1169.94	1985.88	832.925	2491.55	5769.31	2344.45	1235.03	9876.04	426.284	6570.23	1124.74	4243.05	286390	190236	226759	250775	35645.9	33856.3	43046.3
Pos01105	Positive	[M+H]+	Pyridoxine	170.081	2.78	0.566958	0.812136	0.543692	1786.8	5657.35	2834.3	997.665	4615.13	3517.87	2846.21	1553.99	14052	13124.2	4710.02	3582.49	24466.3	12365.7	8841.36	1952.75	16421	3829.19	1830.1	10123	1788.7	3224.55	1101.07	2485.13	1173.47	1956.2	1913.09	1360.26	1511.02	2392.25	763.436	3466.46	1970.88	1643.92	35021.2	27506.9	24103.8	30603.5	1923.87	7132.82	2871.97
Pos01113	Positive	[M+H]+	L-3-Methylhistidine	170.093	9.59	0.316747	0.849673	0.677748	100803	25176	43462.1	10933.2	17442.6	43850.2	10249.6	27917.6	8626.65	4369.1	72465.6	52192.1	19031.5	17025.8	8526.01	5436.8	2483.6	1504.04	5177.37	51990.9	7372.22	10624.2	54898.3	11653.4	10206	7371.38	11587.3	11550.1	4912.53	9128.35	4927.07	6374.94	67961.6	115762	31121	14546	19021.6	107004	13355.5	10972.4	24972.1
Pos01146	Positive	[M+H]+	Metronidazole	172.071	0.97	0.614313	0.694903	0.477192	813.461	2145.01	576.663	647.752	688.221	1337.42	1155.07	385.582	3293.83	4254.93	1868.36	3526.48	4109	2784.43	2447.06	288.977	280.469	421.628	894.096	220.683	240.312	908.816	124.539	594.494	74.3343	1194.15	931.157	635.396	1202.51	2338.47	1440.84	490.559	942.458	1187.22	13892.1	2973.87	2592.4	18600.3	1330.83	754.786	1494.04
Pos01222	Positive	[M+H]+	Arginine	175.119	12.31	0.508428	1.08927	0.513649	171691	406380	454926	283390	339423	256997	371200	292597	134310	140734	198613	152258	214005	150108	166127	76850.6	88380.5	82188.2	74751.1	223958	156360	201824	147742	139469	203259	263196	99710.4	171791	258450	154070	126230	132359	252251	250170	341357	232841	216126	323527	220147	271894	211667
Pos01241	Positive	[M+H]+	Citrulline	176.101	9.93	0.284814	1.08332	0.654219	22992.1	52348.1	14343.1	13263.8	22942.6	6258.08	17210.9	18072.4	14594.6	22929.6	33649.1	32949.1	17437.1	7735.08	21099.3	5961.95	6467.22	8120.76	7655.7	4149.51	5903.06	11103.9	8482.58	5634.6	10778.5	9889.86	19110.2	12916.4	20643.7	30911	12442.8	14937.6	28469.5	19335.2	18430.7	23238.8	12828.4	32259.9	26684.9	13551.4	4056.41
Pos01274	Positive	[M+H]+	Cotinine	177.101	1.56	0.673592	1.77207	0.395867	896.916	2800.85	1.00989e+06	4304.03	240824	627.851	32897.9	514.664	3574.4	490476	2646.07	5661.86	10765	2757.47	1748.26	340672	3495.22	2681.23	2585.43	161687	600.341	2434.19	886.426	634.974	139.774	5831.56	1057.03	78.8559	1547.49	3066.2	44660.6	971.818	175887	30150.8	9390.94	510452	537181	3836.66	2015.34	1296.26	3491.19
Pos01320	Positive	[M+H]+	D-(+)-Glucosamine	180.085	7.45	1.07823	1.89505	0.110539	9004.3	149317	67084	4015.33	186473	63500.1	48667.8	622.094	4544.56	524.173	2322.88	3434.4	4014.07	22635.9	12106.6	30926.3	36636	24903.5	20358.4	56110.4	6894.23	9937.74	2923.74	985.797	1373.6	19804.4	3617.35	2744.03	3108.77	58240.5	22217.1	38190.3	2174.9	68570.2	10508.5	16722.2	3741.85	18778.8	5196.67	14768.5	5010.43
Pos01341	Positive	[M+H]+	Theophylline	181.071	1.13	1.1163	0.277662	0.104967	104.538	2220.22	325.087	327.987	779.309	45111.3	273.602	595.445	807.785	18234.9	1237.81	4544.68	334.416	3139.01	703.844	912.053	910.073	319.764	529.007	2119.9	33145.5	12294.3	654.93	477.024	190.601	790.112	2377.24	156.195	9740.3	438.029	1146.32	7549.02	4104.35	7976.1	126121	56473	55279.4	27094.4	27074.9	1736.39	321.308
Pos01342	Positive	[M+H]+	Theobromine	181.071	1.73	0.331751	0.704342	0.618747	397.068	8091.16	10130	404.731	1234.75	266510	612.82	2222.72	254.874	163049	9363.23	35372.2	692.565	16679.6	1197.46	2377.1	57172.1	23739.6	552.291	685567	123776	66919.3	815.365	293.675	212.837	1019.06	4872.49	959.919	64053.1	58.1148	193.765	52368.9	12042.7	54830.5	913880	239177	423877	167465	186892	536.651	565.215
Pos01343	Positive	[M+H]+	1,7-Dimethylxanthine	181.072	1.23	0.558652	1.95564	0.463669	238.943	3068.6	656.709	280.479	429.415	18608.1	387.5	1248.35	287.761	13204.6	1129.77	1846.88	889.978	2017.15	716.458	912.053	14480.9	9204.95	695.718	186041	7920.62	10904.8	177.285	167.474	914.884	603.807	409.08	155.437	2181.27	403.334	342.577	2008.73	665.934	2690.05	52099.6	24360.7	22347.7	11255.5	22005.9	277.012	243.906
Pos01356	Positive	[M+H]+	Tyrosine	182.08	7.25	0.0318447	0.94846	0.893739	104333	469805	373418	68942.2	217794	257006	355215	91190.5	22.6098	57.5796	30.7358	27.6226	447.686	1434.32	499.502	523.231	787.247	1026.61	395.824	257.464	167463	146470	179153	127443	158654	230626	156452	140473	210016	233258	208461	291.778	306124	387191	508.08	191.773	1843.65	1426.54	1663.54	1722.88	928.824
Pos01382	Positive	[M+H]+	4-Pyridoxic acid	184.06	0.81	0.757455	0.225247	0.249234	242.457	245.187	2272.34	86.7932	232.781	941.096	762.62	3194.58	114.077	454.68	1100.9	1160.15	141.318	146.549	404.479	312.978	499.041	1372.06	648.22	533.318	249.995	35.9254	690.826	454.8	463.795	1432.08	40011.2	32308.9	1618.45	505.685	161.213	248.767	162.6	728.426	805.883	803.223	697.012	445.917	232.192	746.099	353.709
Pos01385	Positive	[M]+	Phosphocholine	184.074	12.01	0.0297491	0.994651	0.959828	76019.1	45810.8	47199.7	67392.7	35517.1	31558.7	45743.6	56978.7	44357.3	39877.8	43644.8	39081.3	52375	48682.8	52433.4	23763.3	23646.4	23791	25995.8	28718.9	48657.5	49044	76328.6	49160.5	45282.9	66300.9	21614	33862.5	51721.5	35953.1	30351.4	17492.7	69962.5	67962	36925.5	43278.6	34558.1	57815.4	39971.1	43238	39455.2
Pos01509	Positive	[M+H]+	Vasicine	189.095	7.19	0.806664	3.73831	0.326734	1280.81	1144.71	622.404	252.157	281.939	1119.51	1032.51	34382.6	16.4435	30.7753	20.4905	23.0188	29.1266	30.3204	87.4549	9.60056	21.2769	55.8037	34.46	128.732	1232.37	1113.69	902.543	1235.02	287.172	407.401	1032	1222.27	825.983	234.194	382.106	15.112	316.914	358.465	199.603	37.984	48.9131	3342.41	112.578	89.7635	17.1004
Pos01512	Positive	[M+H]+	Antipyrine	189.101	0.99	0.64656	0.222144	0.375866	1011.12	1472.62	1203.97	645.924	1901.28	1263.87	718.051	2284.34	3541.51	2077.83	11089.1	15558.4	3117.62	3688.98	10964.7	394.583	1296.93	1174.53	1106.44	1469.55	1102.97	1156.41	1114.26	932.618	2053.41	9737.23	3070.96	2868.38	2355.73	1397.36	1208.32	1090.39	295655	6097.04	8534.89	2432.83	3342.08	24999	3268.77	2600.25	1840.55
Pos01611	Positive	[M+H]+	Caffeine	195.087	1.02	0.785484	0.4074	0.27011	198.534	4450.97	3543.29	633.134	1136.43	388764	456.829	771.996	3544.59	72034.1	2517.54	2519.02	2317.18	21261.4	5502.93	809.327	12405.4	3495.26	507.586	123883	12096.6	3142.02	11796.8	112.708	234.439	1130.17	323.974	545.167	64948.1	352.158	520.067	24639.5	11559.1	2445.5	704161	258510	443290	338929	167315	2089.66	2027.75
Pos01741	Positive	[M+H]+	N,N-dimethyldodecylamine N-oxide	202.216	3.89	0.648833	1.58571	0.263571	37.7741	34.5969	4.90082	252.157	27.471	32.6864	89.1374	10.8263	4584.64	11172.4	3230.05	1585.23	1114.36	3014.36	16282.6	6713.67	3350.15	8777.12	6588.37	1788.87	161.969	100.98	284.975	115.089	153.116	15.7124	18.5945	60.6584	41.3977	429.355	118.584	3145.62	347.984	17.7665	737.57	3043.35	1315.95	592.912	3334.11	2407.21	2659.57
Pos01767	Positive	[M+H]+	SDMA	203.149	12.12	0.0535954	0.999601	0.997886	54054.8	85278.4	42691	43481.6	73765.4	31475.6	46284.6	58775.8	47865.9	62584.1	72954.6	27695.5	25525.7	60661.9	24696.8	31096.2	24143.5	21295.7	43680.3	26416.8	16680.1	32010.5	46661.2	21318.5	18248.8	43901.7	27290.4	43318.4	29949.3	45687.7	44534.3	37587	136319	77275.8	56543.1	82551.3	46439.3	48067.3	52346.6	44489.9	59234.1
Pos01790	Positive	[M]+	O-Acetyl-L-carnitine	204.121	8.2	0.709725	0.787183	0.320305	2503.63	5012.04	5784.6	4314.99	23453	28013.6	13110.6	8197.15	4511.68	2027.2	13223.8	4676.65	12097.2	8701.96	4306.31	3148.98	3233.13	997.38	4456.51	5517.08	11665.3	2853.64	2725.21	5610.79	3680.5	3648.65	10569.6	15328.4	28085.4	2579.6	12299.5	14332	6779.48	12493	15792.1	9880.48	2477.64	8561.22	13003.7	22181.2	11874.9
Pos01829	Positive	[M+H]+	Tryptophan	205.097	6.22	0.637661	1.17511	0.494139	327649	273045	474374	300004	261324	452002	392919	402706	57485.3	78099.8	67768.6	94735.4	108665	60230.7	68306.5	34546.7	28523.7	24794.5	32282.5	67233.1	209118	211229	260444	245381	212755	282918	203415	174861	263408	253013	225712	189858	319426	332888	57581.7	54202.3	63181.7	52157.5	72679	71883.2	43130.9
Pos01894	Positive	[M+H]+	kynurenine	209.091	6.41	0.578102	1.24307	0.355409	1650.64	1833.64	1555.19	3246.98	3413.63	2033.37	503.874	2902.27	5179.69	3126.17	4799.44	3009.32	7171.61	4133.68	3759.72	5768.02	1102.53	4679.54	975.124	5042.28	1665.46	808.807	791.19	1163.59	564.814	588.094	681.561	1409.55	3255.64	1015.71	2294.96	855.572	733.253	472.379	8984.26	6383.17	1771.22	5894.59	9753.05	2096.41	4743.12
Pos01942	Positive	[M+H]+	Cyclo(leucylprolyl)	211.142	1.06	0.0670971	1.05846	0.871373	9483.06	7146.52	41242	486.042	19529	3978.21	3506.07	383.083	8615.35	2890.89	15073.6	9132.33	9526.54	4856.32	4663.7	807.407	2444.91	1228.57	1894.37	1777.17	341.543	7876.4	141.389	3040.73	673.456	15713.6	923.291	544.409	1193.63	11923.1	454.186	1097.36	29917.3	3226.18	10615.2	10198.2	9449.64	21351.7	14041.1	16578.3	7165.09
Pos01943	Positive	[M+H]+	Cyclo(proline-leucine)	211.144	5.11	0.540501	1.62541	0.424067	199.412	236.162	158.46	353.568	147.476	626.489	506.35	452.205	662.877	658.194	5456.06	16164.6	3750.85	1407.37	1322.76	173.77	1570.62	335.708	85.6842	845.952	259.678	211.669	172.157	206.367	158.199	286.191	410.51	499.673	188.261	230.724	84.4817	411.511	327.271	369.961	641.504	1766.72	1947.12	1502.5	423.172	1406.3	6706.97
Pos01954	Positive	[M+H]+	Phosphocreatine	212.043	11.53	0.870117	0.810818	0.238006	7970.34	416.667	171.529	5499.04	339.773	275.11	623.962	5158.3	5547.61	3093.41	8079.78	7537.89	10553.5	6603.96	5045.48	2182.21	3769.89	2163.94	2723.27	2121.57	4768.39	6461.72	4588.9	4472.6	5346.35	3129.02	1847.3	4114.15	3198.47	2997.68	3062.27	1555.37	5644.39	3548.07	6055.33	8387.06	8448.8	6173.78	4115.12	7777.58	6769.08
Pos02021	Positive	[M+H]+	2-Benzothiazolsulfonic acid	215.977	0.62	0.809277	1.26938	0.186179	3788.83	8385.99	6725.55	4061.92	3757.74	4938.37	3382.27	4120.65	15086.9	7591.57	5243.71	2951.78	5801.58	6116.3	5886.39	12175.4	1824.01	1566.05	3042.72	4079.29	5394.26	2091.44	3802.11	4630.55	1954.29	3172.79	2968.69	8340.53	3024.01	2331.53	2189.55	2178.45	8.28534	5320.54	9400.55	3199	6443.36	11417.3	2626.48	5659.93	3283.29
Pos02088	Positive	[M+H]+	Propionylcarnitine	218.139	6.91	0.580325	1.08313	0.395457	447123	570217	351985	392402	483485	605274	401765	357425	399866	256624	364759	546983	625556	403912	353646	156683	235029	214534	186463	452760	493564	211557	502613	400395	331673	349428	315610	195844	376584	296845	477234	400404	480692	227087	555165	356523	360936	488844	409472	324787	411504
Pos02144	Positive	[M+H]+	Pantothenic acid	220.117	6.15	0.187478	1.01068	0.977054	153734	183194	185052	273897	123397	179240	108005	350087	4164.31	4415.76	5352.68	4510.15	3409.97	4394.78	3869.04	560.673	1080.29	895.516	882.92	2205.16	190966	181484	146578	194641	119692	7164.88	106219	120449	211863	90282.6	69641.6	81911.7	282745	217469	502.743	969.056	5562.93	3675.86	5810.82	298.247	3032.18
Pos02145	Positive	[M+H]+	trans-Zeatin	220.119	2.82	0.0827252	0.971386	0.939892	2371.86	6179.31	1823.1	3182.11	4130.77	1513.11	2052.64	1440.73	7067.61	15936.6	28286.2	10954.6	30148.2	7659.28	6777.76	2753.44	2341.43	1655.51	3043.65	12833.1	3269.3	3998.4	2985.28	1282.65	1975.89	1534.21	1923.82	1378.46	1684.49	3057.53	1350.16	5657.7	5867.06	4443.71	51072.7	31478.6	16584.4	5544.37	10321	10734	9633.85
Pos02182	Positive	[M+H]+	Diethyl phthalate	223.096	0.8	0.221048	1.03346	0.767844	87499.8	184803	127031	86395.8	212303	165260	183232	68860.9	79287.3	39973.1	58567.5	56850.3	98900.9	83375.3	80909.3	65098.5	70662.6	55794.8	66568.2	129902	107462	102431	108427	66261.1	73078.9	60053	88399.9	92752	96853.9	110564	118763	135694	134048	137847	91213.2	114209	76291.3	64105.5	94190.3	96758.4	97296.1
Pos02202	Positive	[M]+	4-Hydroxybenzoylcholine	224.128	8.24	1.09223	0.787407	0.11536	20478.8	31435.1	33484	31105.8	23399.5	14567.2	9857.11	21277	38491.1	16718.9	40149.3	18004.5	52377.1	26545.5	22444	34564.9	6836.67	14326.5	53819	24597.8	50566.8	6484.05	8821.04	30381.1	36769.4	19614.7	58170.2	21717.2	55753.9	50721.2	34337.6	28431.5	20294.9	30465.3	34035	61894.5	22502.9	54819.2	48176.2	15476	33840
Pos02314	Positive	[M+H]+	Ergothioneine	230.096	8.09	0.386704	0.682043	0.544431	20543.9	818.292	378.996	655.974	1033.78	286.006	3905.95	2643.28	94.5499	0	66.1285	145.018	74.4346	89.2768	52.1366	37.4422	77.3707	58.461	20.4897	105.326	2395.2	873.861	1379.45	497.661	916.79	627.376	10495.2	679.374	2193.09	21278.7	7989.34	1372.87	4185.13	6357.26	143.031	95.4233	74.3103	278.205	219.124	34.7472	44.1011
Pos02354	Positive	[M+H]+	4-Formylaminoantipyrine	232.106	1.69	0.210885	1.74042	0.662904	336.453	312.876	584.831	381.89	331.098	1530.81	698.243	336.447	314.481	308.746	1026.39	634.552	751.897	369135	53683	2157.25	674.092	658.129	1209.82	1374.25	997.34	474.798	272.521	227.003	279.548	281.702	639.366	88.7129	498.744	555.126	417.758	534.732	311467	221.558	213.479	526.218	387.543	807.979	869.462	691.083	1143.03
Pos02359	Positive	[M+H]+	Aminopyrine	232.143	0.99	0.700125	3.91731	0.242561	599.994	839.351	1349.36	148.919	1116.19	298.263	921.087	0	1547.74	1357.09	1828.31	287.735	1305.3	63631.6	14642	739.243	154.741	284.333	130.389	591.832	352.106	1145.73	435.887	600.05	380.566	907.955	90.112	123.591	1146.32	163.936	216.242	778.849	12155.6	1043	2877.7	1686.12	1208.72	1560.71	972.993	494.182	980.126
Pos02362	Positive	[M+H]+	Butyryl carnitine	232.154	6.32	0.298309	0.97334	0.753144	243732	317240	273903	225620	308320	335983	205644	218931	199895	165382	323612	336073	284633	264108	217624	147396	151540	201168	257570	370415	254103	154514	258400	249769	190327	254145	260578	210369	85196.5	183021	176566	345570	251517	208033	434743	231867	229313	295813	269416	322318	390107
Pos02384	Positive	[M+H]+	Melatonin	233.129	0.99	0.708306	2.14467	0.224513	585.06	1450.06	2283.78	291.443	777.863	1608.44	549.681	393.077	3233.2	1990.47	1849.73	3036.18	2612.76	30788.7	7890.28	456.987	794.017	232.072	673.366	529.974	1486.77	1733.16	505.483	330.186	950.462	1822.64	489.179	140.272	255.286	125.771	1039.36	1327.53	2939.23	1159	2650.34	2028.9	2447.54	5752.53	1506.73	1140.87	1426.54
Pos02693	Positive	[M+H]+	Uridine	245.074	3.86	0.103811	0.993814	0.983203	3091.33	1890.8	5185.06	1566.85	1312.82	1163.09	2332.43	3022.2	11721.1	4369.1	7027.31	5628.86	6055.09	17823.4	6253.03	5903.39	6327.95	4148.96	16659.1	9567.95	1665.46	1164.18	897.415	1323.13	895.188	2281.67	1561.23	1915.29	1993.01	1092.9	684.38	3628.04	1039.81	1059.72	12170.4	17263.3	4411.59	13529.4	8082.48	20308.8	18148.1
Pos02723	Positive	[M+H]+	4-Acetamidoantipyrine	246.123	1.12	0.29456	0.583871	0.732609	406.731	571.601	501.517	2319.66	1012.09	1923.05	630.152	1881.27	1861.19	883.549	1247.13	1444.05	1171.54	1.01323e+06	178043	1070.46	1930.4	866.285	2580.77	700.502	273.762	837.936	68.8628	101.596	452.994	189.672	335.417	708.187	356.809	170.875	742.509	1506.55	2.67844e+06	275.903	3100.78	1914.02	1331.94	4250.03	1963.07	1913.99	669.617
Pos02795	Positive	[M+H]+	Matrine	249.195	2.13	0.779933	0.42577	0.279198	225.766	437.726	326.721	166.278	267.481	192.033	199.321	261.496	606.353	233.297	197.454	215.609	482.206	176.869	192.569	443.546	498.074	330.393	298.963	379.508	203.341	353.428	520.134	350.823	361.506	423.114	207.401	241.875	162.634	357.362	216.242	411.511	8911.92	438.937	653.246	136.187	423.287	519.908	667.425	114.859	579.615
Pos02924	Positive	[M+H]+	Pranoprofen	256.097	2.86	0.548936	2.02696	0.445666	111.565	186.522	506.418	194.6	367.244	487.572	463.019	116.591	2037.96	495.383	829.866	341.446	791.811	689.79	788.776	372.502	865.584	717.476	405.137	30021.3	234.15	277.694	131.132	177.793	148.669	152.635	270.336	532.277	230.645	278.43	189.115	553.332	431.874	547.626	2237.26	415.971	744.985	1811.29	975.003	489.356	416.711
Pos02971	Positive	[M]+	sn-Glycero-3-phosphocholine	258.109	9.84	0.613131	1.13581	0.283252	23622.9	51323.8	55639	33215.3	28619	18373.8	30470.1	16843.2	31121.3	52296.2	24776.8	32616.1	44702.8	42119.3	60041.2	26492.8	23607.7	35887.1	11416.5	24890.4	26628	31393	35382.3	13667.8	13018.7	14718.1	16813	13221.3	42911.7	39450.4	17435.8	31179.5	13765.1	25599.4	42227.2	29432.1	29361	41865.9	50741.4	22304.8	26845.9
Pos03004	Positive	[M+H]+	D-Glucosamine-6-phosphate	260.052	6.26	0.444799	1.27621	0.439851	361.05	807.763	834.772	173.586	1354.75	412.666	226.558	478.854	9485.82	12032.1	10540.5	7314.61	14881.5	13290.5	5855.28	14844.4	7497.22	2062.08	3025.02	11738	478.864	415.57	136.993	242.084	419.322	723.895	1269.44	705.154	571.683	440.631	386.756	6573.72	703.219	450.432	7076.83	13258.3	9656.58	3370.03	8041.26	18186.3	17170.6
Pos03068	Positive	[M+H]+	Indarubicin	263.08	0.9	0.86846	5.94144	0.222678	3238.91	239513	39683.5	4526.04	1730.67	2303.03	495.208	993.519	714.263	141.963	1102.76	1421.79	535.066	5648.02	1424.51	5921.63	368.478	618.269	450.773	1869.12	2002.6	495.188	862.983	242.878	580.697	147.024	482.028	272.204	580.554	18247.2	747.935	203.431	4045.32	1285.46	2189.23	300.166	561.56	933.269	357.836	23854.9	527.414
Pos03183	Positive	[M+H]+	Atenolol acid	268.153	8.17	0.607069	0.325825	0.332766	145.826	188.027	231.972	34.7173	78.0754	149.813	82.9473	55363.9	48.3027	0	49.3635	8.44023	84.1434	26.9515	33.6365	98.8858	64.7979	57.5752	72.6453	148.794	63.3791	148.556	63.7348	35.7173	77.511	13.4678	75547.5	107870	110.394	116.23	96.8827	122.058	55.9261	53778.1	120.616	29.6461	31.041	198.295	68.3507	34.7472	41.4011
Pos03189	Positive	[M+H]+	Metoprolol	268.19	3.56	0.769231	0.17703	0.240354	54.465	191.035	411.668	100.497	182.176	221.995	90.3754	36891.8	236.375	133.029	425.644	392.087	391.59	322.576	156.41	194.891	144.103	201.07	222.593	205.637	111.794	111.66	110.62	92.0712	26.6841	94.2747	91272	151561	126.165	84.1363	125.56	296.428	194.706	55593.4	187.862	231.61	236.1	291.03	157.81	339.75	130.503
Pos03550	Positive	[M+H]+	6-Methyladenosine	282.12	7.18	0.444258	1.1499	0.654499	32068.5	49455.5	64878.6	19828.1	22238.5	49733.7	29625.8	32044.1	2380.19	2959.39	245.886	230.955	2763.79	14767.7	4197.84	718.122	1219.56	990.294	1004	3064.49	25596.3	17405.4	28046.2	36070.5	15621.6	24235.3	27919	38704.6	23935.8	27201.2	27379.8	6601.62	22606.6	24265.9	5710.56	777.283	1769.34	7528.31	5933.45	1818.44	1584.04
Pos03648	Positive	[M+H]+	Tropicamide	285.159	1.35	0.883336	1.55338	0.196661	1.05253e+07	965528	450365	7.61685e+06	2.81167e+06	2.6711e+06	5.44052e+06	1.89524e+07	1.1909e+06	2.3065e+06	3.90779e+06	2.6323e+07	4.75899e+06	1.11756e+07	1.41829e+07	733949	886418	252446	1.00624e+06	1.05438e+06	2.02319e+06	1.70212e+06	4.30046e+06	2.30978e+06	6.73325e+06	2.09086e+06	1.93838e+06	9.47602e+06	1.00817e+06	1.33112e+06	229871	3.27121e+06	66583.1	1.77096e+06	8.06881e+06	2.56023e+06	4.50715e+06	8.04561e+06	751418	1.1847e+07	4.37519e+06
Pos03745	Positive	[M+H]+	Piperine	286.144	0.88	0.263995	0.749978	0.783335	1022.54	1219.92	1979.93	605.725	140.247	623.765	745.288	214.86	497.415	1387.87	568.146	928.425	541.538	721.794	425.502	54609.9	82261.5	628.898	1589.81	1543.11	1588.88	204.872	249.811	650.055	336.728	3724.97	2081.87	988.732	3048.65	1223.88	713.057	184.831	153.279	2750.67	5114.96	14906.4	22027.8	1366.36	5430.87	1205.53	3104.18
Pos03987	Positive	[M+H]+	Trimethoprim	291.145	1.73	0.621674	0.0126145	0.386342	812.583	203.069	481.913	717.186	452.548	266.939	362.74	512.166	629.99	395.115	494.566	1560.67	619.209	154.129	432.229	117.127	456.487	52.2606	548.565	805.828	186.616	372.847	1063.71	720.695	988.583	512.899	291.076	423.092	212.903	243.735	236.394	1203.15	1.0255e+06	424.305	184.659	183.435	466.556	335.425	396.032	393.801	483.313
Pos04396	Positive	[M+H]+	5'-S-Methylthioadenosine	298.099	2.66	0.141673	0.975662	0.926147	12930.2	2814.38	18270.2	4776.37	4784.29	9468.16	12698.4	2017.85	12247.3	18814.6	11487.7	7386.73	7638.71	12948.5	3739.54	7591.16	10489.5	19308.1	3621.09	46819.9	5525.42	6913.21	2229.98	4965.5	2301.82	4480.29	4789.52	3627.37	4841.56	1761.66	764.986	10531.9	14208.3	9325.31	27646.6	13043.3	15583.5	4217.47	9570.11	17197	27062.8
Pos04890	Positive	[M+H]+	Ranitidine	315.149	2.87	0.760278	0.0752385	0.301289	1046.26	1126.66	1024.27	154.401	1097.39	412.666	508.826	438.048	702.958	1126.77	481.527	1582.93	3912.67	2010.41	1104.12	819.888	1965.22	3586.49	1859.91	1566.52	533.44	550.533	489.366	299.231	167.729	167.225	1100.65	379.873	347.938	649.671	636.326	1186.87	5904.34	68442.7	552.911	2864.55	2450.36	1106.9	1021.24	1997.96	463.512
Pos05204	Positive	[M+H]+	Ranitidine N-oxide	331.141	6.84	0.6653	0.0838884	0.370682	90.4822	57.1601	99.6499	111.461	140.247	84.4398	229.034	81.6134	180.878	42.6883	175.101	73.6602	117.585	93.488	159.773	25.9215	25.1455	138.181	39.1167	26.7495	73.9422	33.0125	47.6179	68.2597	28.5901	145.901	140.174	31.8456	226.702	39.8997	24.802	101.134	42.4624	438.937	121.683	39.8369	60.2008	84.8427	40.2063	139.954	33.3009
Pos05205	Positive	[M+H]+	Ranitidine-S-oxide	331.144	5.21	0.64533	0.0433931	0.384187	115.079	102.287	156.826	58.4712	144.584	42.2199	89.1374	194.873	176.767	57.5796	68.9226	339.144	179.074	77.4855	71.4776	86.4051	363.642	103.635	87.5469	115.357	27.2882	31.0706	53.4786	46.0356	20.9661	29.1803	33.6132	54.5925	42.3834	11.276	44.9536	126.708	44.5337	655.27	93.9308	39.8369	95.0044	139.103	46.2373	143.815	91.8024
Pos05221	Positive	[M+H]+	Piroxicam	332.068	0.59	0.781955	90.2179	0.259164	72.0344	94.7654	80.0466	41.1126	92.5339	62.6489	84.1853	29.1477	144.908	63.5361	264.514	210.238	282.636	173.5	232.092	220834	48.3567	46.9459	33.5286	118.701	44.8935	27.1868	74.7235	54.7665	100.383	101.009	194.528	260.831	33.5125	50.3083	41.0783	195.294	122.209	268.587	67.2459	88.0118	67.7259	278.205	223.145	98.4503	195.305
Pos05226	Positive	[M+H]+	Ciprofloxacin	332.148	10.02	0.533373	1.57601	0.44333	15177.3	1305.66	8834.54	772.003	572.553	12851.2	793.571	6469.95	3519.93	421.919	22385.9	6765.23	7942.92	1227.98	392.706	259.215	110.253	111.607	139.703	84712.2	458.618	2205.04	4101	516.71	254.134	801.335	198.819	2417.99	621.952	1253.37	413.883	19800.2	9369.69	20882.9	3808.47	749.49	2273.52	23842.8	4153.31	2976.68	5973.46
Pos05335	Positive	[M+H]+	Isopentenyladenosine	336.166	1.93	0.634175	2.31342	0.338712	994.426	682.913	1476.78	1078.06	942.689	407.218	749.002	526.323	1864.28	3395.21	3054.02	50540.1	2032.39	1105.01	2805.28	649.958	818.195	824.654	577.437	1008.12	454.217	339.835	191.937	834.197	700.775	534.223	225.995	817.372	823.026	860.445	39.5282	962.518	277.559	549.716	3760.43	717.991	2486.1	11184.4	2377.2	2404.31	4199.51
Pos05403	Positive	[M+H]+	Erucamide	338.341	0.84	0.642937	0.519202	0.433952	2600.27	2844.47	10793.2	18343.5	12234.7	2601.29	10115.9	59065.6	14332.5	14064.3	83556.6	17495.8	57466.7	5134.26	25092	14936.6	18640.5	9955.2	15093.5	32273.2	20846.4	8285.18	565.554	25426.7	479.679	222925	1322.36	2021.44	1934.85	4403.71	2346.11	536722	2767.3	5839.95	8111.14	2192.88	22752.1	28496.3	55162.1	2837.69	3151.88
Pos05518	Positive	[M+H]+	CocamidoprpylBetaine	343.296	4.09	0.86662	1.32522	0.229838	15949.5	7516.55	18265.3	5939.4	4146.67	5830.43	15389.8	6759.76	6475.64	4990.56	4561	2947.17	3867.36	3898.7	11335.5	15485.7	10061.1	12780.8	5063.75	39806.6	3292.19	16937.4	3163.29	6922.8	7541.44	1566.76	2638.28	5523.7	3886.46	3645.62	3373.07	4233.68	13091.9	3726.78	7132.33	11029.3	10015	20230	11144.2	8383.72	20510.6
Pos05762	Positive	[M+H]+	trans-Zeatin riboside	352.16	3.53	1.1574	68.6804	0.08767	346.116	925.091	545.624	182.723	624.604	378.617	882.708	458.867	131920	486639	5.66628e+06	20105.4	23319.6	543849	2.41179e+06	453.147	911.04	638.642	159.261	540.005	290.487	166.034	579.473	433.37	300.514	301.903	95.8334	150.888	300.626	161.333	139.511	217.38	491.942	94.0578	10348.4	25179.7	84496.5	12878.3	6466.18	14108.3	6169.66
Pos06038	Positive	[M+H]+	Levofloxacin	362.152	2.21	0.327508	1.12011	0.700651	7.30381e+06	6.61941e+06	506854	1.9717e+07	7.07674e+06	1.72364e+06	2.67629e+06	7.22825e+06	300296	616919	6.35054e+06	7.24426e+06	1.63713e+06	3.70807e+06	5.89654e+06	756693	2.18168e+06	62068.7	2.00231e+06	1.93087e+06	4.15941e+06	1.95986e+06	5.99698e+06	6.64241e+06	3.66425e+06	5.91116e+06	670049	1.65831e+07	4.88891e+06	6.16018e+06	6.74621e+06	1.99234e+06	819786	651835	1.91975e+06	922212	2.47433e+06	3.03824e+06	6.861e+06	7.52041e+06	3.66489e+06
Pos06536	Positive	[M+H]+	Karakoline	378.267	0.85	0.825835	1.19189	0.286194	511861	938932	788051	389259	753901	699987	533767	415383	217042	170311	173607	176523	229618	219956	203524	161716	167043	156683	139715	272132	392165	453677	359393	265535	296277	293221	381216	376198	431011	384006	373436	549836	435883	414499	220951	237630	200636	287759	268926	198333	209589
Pos06836	Positive	[M+H]+	Hexa(methoxymethyl)melamine	391.227	0.86	1.13941	1.47552	0.111624	4070.82	12808.4	8509.45	19089.9	322.423	9886.27	401.118	3213.74	478.916	1742.28	6054.95	7068.31	6611.73	593.775	6143.71	4071.6	4237.01	3100.2	2884.39	7108.67	6212.91	4570.29	6332.45	3242.34	616.911	2993.22	848.912	379.115	4935.2	5180.02	3491.65	2016.87	664.899	4393.55	857.118	1642.58	6101.91	954.973	7728.66	783.742	7393.69
Pos07056	Positive	[M+H]+	Mitragynine	399.233	6.54	0.222999	0.970255	0.907226	235.429	1046.93	155.192	1034.21	166.272	934.286	183.227	121.587	9255.62	2659.58	1795.71	8358.13	6015.18	2725.47	2307.46	4114.8	4386.92	8040.16	4415.53	8925.96	209.503	1939	2463.68	3736.82	1969.54	5410.69	504.913	1441.39	622.937	1451.13	1182.74	2536.49	2382.04	3154.07	4880.13	3071.15	4880.97	5839.35	6739.58	6788.25	8341.42
Pos07062	Positive	[M+H]+	Tri(butoxyethyl) phosphate	399.251	0.84	0.810967	9.1803	0.245021	2.40256e+06	46534.3	45314.6	18132.5	24994.3	41018.7	34049.3	21800.8	9396.41	7904.29	9090.34	8129.47	9273.04	11427.4	14043.2	9566	10540.8	9538	10183.4	12742.8	12957.5	15000.3	17392.3	22789.2	9484.29	14852.8	15884.7	14316.9	16449.7	20102.5	19674.9	22285.5	19947	23159.1	12003.9	12469.9	13830.2	14363.1	12162.4	11193.4	12549.9
Pos07167	Positive	[M+H]+	Nobiletin	403.14	0.88	0.858423	2.74719	0.233664	2935.84	13047.5	10848.8	7605.83	6860.52	12523	164702	2639.94	7820.92	1495.08	3853.15	2644.86	2534.01	2628.61	1824.78	10642.2	4535.86	1434.95	3409.67	2932.41	5492.85	2474.97	4931.02	3014.54	14127.3	2704.79	5278.7	5142.31	2785.48	3734.96	3570.71	6390.05	5359.58	11476.1	6466.28	4191.21	5021.12	3652.18	4133.21	6079.79	6061.66
Pos07495	Positive	[M+H]+	Daidzin	417.117	2.88	0.301741	1.14944	0.564572	43.0449	885.982	62.077	124.251	341.219	155.26	210.463	24.1509	385.394	725.701	135.051	628.413	680.699	174.342	387.661	565.473	913.941	539.435	418.176	937.903	98.5897	199.046	130.4	67.466	147.398	44.8927	81.5299	262.347	92.6521	207.305	144.162	752.113	398.732	86.7422	182.525	512.321	728.994	757.665	390.001	590.702	81.9021
Pos07860	Positive	[M+H]+	Apigenin-7-O-glucoside	433.11	3.1	0.329092	0.830783	0.746959	37.7741	81.2275	13.0688	22.8403	76.6296	64.0108	66.8531	42.4723	92.4945	81.4056	107.109	71.3583	73.3558	266.988	27.7501	154.569	29.9811	164.754	117.35	51.8271	37.8514	12.6224	25.6404	5.55602	36.8495	20.2017	41.4801	17.4393	28.5841	24.2868	13.1761	132.521	222.669	9.40578	29.8871	324.254	25.3972	1138.47	81.4178	26.0604	27.9007
Pos09101	Positive	[M+H]+	LPC 16:0	496.337	4.65	0.763581	2.51045	0.274762	17.5694	350.482	303.851	250.33	303.627	311.883	191.893	22.4853	1202.43	72.4709	128.531	259.345	1540.47	207.19	247.228	1303.76	2022.28	16814.6	43408.4	7690.47	544.884	1492.36	1008.77	77.7843	157.563	71.8283	166.636	90.9876	29.5698	639.262	436.36	10609.8	30.0344	223.649	138.761	183.435	47.9725	41.4348	18.0928	57.912	236.706
Pos09915	Positive	[M+H]+	Amentoflavone	539.096	0.7	0.868931	0.0671454	0.228759	25.4756	91.757	27.7713	82.2252	36.146	34.0483	29.7125	18.3214	186.017	17.8695	48.4321	85.1696	337.652	45.4806	59.7048	70.0841	89.9434	113.379	47.4989	83.5921	35.2106	5.82574	27.8382	35.7173	29.8608	48.2597	306.81	625.54	92.6521	94.5449	10.0758	77.8849	66.2827	66.8856	61.9089	232.536	3799.23	130.224	19536.3	102.311	3763
Pos14267	Positive	[M+H]+	alpha-Chaconine	852.505	6.75	0.651771	0.110426	0.382231	8.78468	24.0674	29.4049	32.8901	14.4584	43.5819	30.9505	34.1444	47.275	7.94201	45.638	142.717	64.7257	20.2136	14.2955	23.0413	10.6385	14.1724	9.3135	83.5921	33.4501	131.079	32.9663	0	15.8834	7.85622	6.43657	66.7242	33.5125	11.276	22.4768	17.4369	39.3554	19.8567	7003.18	172.318	25.3972	73.0042	31.1599	16.4084	16.2004
Pos14405	Positive	[M+H]+	alpha-Solanine	868.509	6.16	0.608865	1.16331	0.387486	89.6037	412.154	284.247	226.576	60.7253	47.6677	75.5192	131.581	58.5798	55.5941	174.169	51.4087	160.735	111.175	52.1366	103.686	125.727	139.952	61.4691	274.182	95.0686	155.353	43.2224	115.883	34.9435	131.311	97.2638	119.8	232.616	102.351	50.379	84.8597	109.781	133.771	207.075	72.2623	104.411	183.497	132.681	75.2856	115.203
Pos15556	Positive	[M+H]+	Solasodine base + 2H, O-Hex-Hex-Hex-Pen	1034.55	7.2	0.631047	0.125237	0.454591	5.27081	33.0927	98.0163	5.48168	7.22921	12.2574	23.5224	4.99674	110.993	257.123	172.307	112.792	11313	277.095	84.0913	23.0413	17.4084	12.4008	8.38215	6.68737	0	21.3611	5.12808	51.5916	8.8947	7.85622	13.5883	5.30761	25.6272	7.80646	0	6.97477	7.24968	14.6312	5.33698	1.85288	9.40637	9.86543	7.03611	5.7912	3.60009
[truncated: 5 more columns]
